# Supplementary material
Source: ML conference proceedings conference paper supplement (https://openreview.net/forum?id=fGfl6dqQVf)
Supplement: supplementary_material [file Appendix.pdf › StochasticSDOT/Appendix.pdf]

# Appendix

## Table of Contents

|     |                                                                                     |           |
|-----|-------------------------------------------------------------------------------------|-----------|
| 547 | <b>A Further details on our Assumptions</b>                                         | <b>16</b> |
| 548 | A.1 The Ma-Trudinger-Wang Properties . . . . .                                      | 16        |
| 549 | A.2 The Poincaré-Wirtinger Inequality . . . . .                                     | 16        |
| 550 | <b>B Properties of the semi-discrete OT problem</b>                                 | <b>16</b> |
| 551 | B.1 Known results in the compact case . . . . .                                     | 17        |
| 552 | B.2 New properties for the non-compact case with the quadratic Euclidean cost . . . | 17        |
| 553 | B.2.1 Definition and regularity of the Hessian . . . . .                            | 18        |
| 554 | B.2.2 Local strong convexity with respect to the mass of Laguerre cells . . . .     | 22        |
| 555 | B.2.3 Quantitative stability of the Laguerre cells . . . . .                        | 22        |
| 556 | B.3 New properties in both our compact and non compact settings . . . . .           | 24        |
| 557 | <b>C Proofs of the convergence rates of PSGD</b>                                    | <b>25</b> |
| 558 | C.1 Fast convergence rates for MTW costs . . . . .                                  | 25        |
| 559 | C.1.1 Convergence of the non-averaged iterates. . . . .                             | 25        |
| 560 | C.1.2 Convergence rate for higher order moments of the non-averaged iterates.       | 25        |
| 561 | C.2 Convergence of the averaged iterates. . . . .                                   | 27        |
| 562 | C.3 Convergence rate of PSGD in the general setting . . . . .                       | 30        |
| 563 | <b>D Proof of Lemma 3.1: Localisation of a projection set</b>                       | <b>31</b> |
| 564 | <b>E Minimax estimation of OT quantities</b>                                        | <b>32</b> |
| 565 | E.1 Kantorovich potential . . . . .                                                 | 32        |
| 566 | E.2 OT map . . . . .                                                                | 33        |
| 567 | <b>F Technical Lemmas</b>                                                           | <b>34</b> |
| 568 | F.1 Technical Lemmas for Appendix B . . . . .                                       | 34        |
| 569 | F.2 Technical Lemmas for Appendix C . . . . .                                       | 36        |

## Notations

- $\mathbb{R}^*$ : The set  $\mathbb{R} \setminus \{0\}$  (i.e., real numbers excluding zero).
- $\|\cdot\|$ : The Euclidean norm. item  $\lambda_{\mathbb{R}^d}$ : The Lebesgue measure on  $\mathbb{R}^d$ .
- **Diameter**: For  $\mathcal{C} \subset \mathbb{R}^d$ , we define its diameter as:

$$D_{\mathcal{C}} := \sup\{\|x - y\| \mid x, y \in \mathcal{C}\}.$$

- **Indicator function**: For a set  $A \subset \mathbb{R}^d$ ,  $\mathbb{1}_A(x)$  is defined as  $\mathbb{1}_A(x) = 1$  if  $x \in A$ , and  $\mathbb{1}_A(x) = 0$  otherwise.
- **Component-wise Minimum**: For  $v \in \mathbb{R}^d$ :

$$v_{\min} := \min_{1 \leq j \leq d} v_j.$$

- **Special Vectors**:

- $\mathbf{1}_M = (1, \dots, 1) \in \mathbb{R}^M$ .
- $\mathbf{0}_M = (0, \dots, 0) \in \mathbb{R}^M$ .
- $\mathbf{e}_j \in \mathbb{R}^M$ , for any  $1 \leq j \leq M$ , is the vector with zeros except for the  $j$ -th entry, which is equal to 1.

- **Probability Measures**:

- $\mathcal{P}(\mathbb{R}^d)$ : The set of probability measures on  $\mathbb{R}^d$ .
- For  $\rho \in \mathcal{P}(\mathbb{R}^d)$ ,  $\text{Supp}(\rho)$  denotes its support.

- **Asymptotic Orders**:

- $\mathcal{O}(\cdot)$  and  $o(\cdot)$ : Standard approximation orders.
- $f \lesssim g$  means there exists a constant  $C > 0$  such that  $f(\cdot) \leq Cg(\cdot)$ .
- $a \asymp b$  means both  $a \lesssim b$  and  $b \lesssim a$ .

- **Filtration**: We denote by  $\mathcal{F}_n$  the filtration generated by the sample  $X_1, \dots, X_n \stackrel{\text{iid}}{\sim} \mu$ , i.e.,

$$\mathcal{F}_n = \sigma(X_1, \dots, X_n), \quad n \geq 1.$$

- **Sets**:

- For any  $\varepsilon > 0$ , define:

$$K_{\varepsilon} := \{\mathbf{g} \in \mathbb{R}^M \mid \forall i \in \llbracket 1, M \rrbracket, \mu(\mathbb{L}_i(\mathbf{g})) \geq \varepsilon\}.$$

- Define:

$$K_+ := \{\mathbf{g} \in \mathbb{R}^M \mid \forall i \in \llbracket 1, M \rrbracket, \mu(\mathbb{L}_i(\mathbf{g})) > 0\}.$$

- **Density of an Absolutely Continuous Measure**: For an absolutely continuous measure  $\rho$  on  $\mathbb{R}^d$ , we denote its density w.r.t. the Lebesgue measure by  $f_{\rho}$ .

- **Orthogonal of Vect(1)**:

- For any  $\mathbf{g}, \mathbf{g}' \in \mathbb{R}^M$ , we define:

$$\|\mathbf{g} - \mathbf{g}'\|_v = \|\text{Proj}_{\mathbf{1}^{\perp}}(\mathbf{g} - \mathbf{g}')\|^2.$$

- Inner product in this space:

$$\langle \mathbf{g}, \mathbf{g}' \rangle_v = \langle \text{Proj}_{\mathbf{1}^{\perp}}(\mathbf{g}), \text{Proj}_{\mathbf{1}^{\perp}}(\mathbf{g}') \rangle.$$

- **Strong Convexity**: We discuss the strong convexity of the semi-dual function  $H$  when the strong convexity holds on the orthogonal complement of  $\mathbf{1}$ .

## A Further details on our Assumptions

### A.1 The Ma-Trudinger-Wang Properties

In the semi-discrete setting, the class of cost functions verifying the Ma–Trudinger–Wang (MTW) properties [24] is defined as the set of cost functions satisfying the following conditions: (Reg), (Twist), and Loeper’s condition (QC), detailed below.

$$\begin{aligned} c(\cdot, y_i) &\in C^2(\text{Supp}(\mu)), \forall i \in \{1, \dots, M\} & (\text{Reg}) \\ \nabla_x c(x, y_i) &\neq \nabla_x c(x, y_k), \forall x \in \text{Supp}(\mu), i \neq k & (\text{Twist}) \end{aligned}$$

**Definition A.1** (Loeper’s condition). We say  $c$  satisfies *Loeper’s condition* if for each  $i \in \{1, \dots, M\}$  there exists a convex set  $X_i \subset \mathbb{R}^d$  and a  $C^2$  diffeomorphism  $\exp_i^c(\cdot) : X_i \rightarrow \text{Supp}(\mu)$  such that

$$\forall t \in \mathbb{R}, 1 \leq k, i \leq M, \{p \in X_i \mid -c(\exp_i^c(p), y_k) + c(\exp_i^c(p), y_i) \leq t\} \text{ is convex.} \quad (\text{QC})$$

**Definition A.2** ( $c$ -convexity). We say that  $X \subset \mathbb{R}^d$  is  $c$ -convex if  $(\exp_i^c)^{-1}(X)$  is a convex set for every  $i \in \{1, \dots, N\}$

For a detailed discussion on this class of cost functions and their implications in the semi-discrete optimal transport framework, we refer the reader to Section 1.5 of [20]

### A.2 The Poincaré–Wirtinger Inequality

A probability measure  $\rho = w(x) dx$  on a domain  $\Omega \subset \mathbb{R}^d$  is said to satisfy the *weighted Poincaré–Wirtinger inequality* (PW) if

$$\int_{\Omega} |f - \mathbb{E}_{\rho}[f]| d\rho \leq C_{\text{PW}} \int_{\Omega} |\nabla f| d\rho, \quad \forall f \in C^1(\Omega).$$

The existence of a finite constant  $C_{\text{PW}}$  provides a quantitative connectedness of the source measure and is necessary for  $H$  to be locally strongly convex. We provide here two examples of measures satisfying (PW). Notably, Example 1 shows that non-degenerate Gaussians, mixture of non-degenerate Gaussians and Student distributions satisfy (PW), when we take their restrictions on any ball  $B(0, R)$ ,  $R > 0$ .

**Example 2.** (bounded support, density bounded above and below) Let  $\Omega$  be bounded, connected,  $\alpha$ -Holder with  $\alpha \in (0, 1]$ , and assume  $0 < m \leq w(x) \leq M < \infty$  almost everywhere.

Note that the assumption of the support being bounded from above and below is classical in the semi-discrete OT literature, as in [12, 29].

**Example 3.** (Annular support with radial concave profile, ([20], Proposition A.1)) Let  $0 < r < R$ , and let  $\bar{\rho} \in C^0([0, R])$  be a nonnegative function such that  $\bar{\rho}(s) = 0$  for  $s \in [0, r]$ , and  $\bar{\rho}$  is concave on  $[r, R]$ , with

$$\int_r^R \bar{\rho}(s) ds = 1.$$

Define the probability measure  $\rho$  on the annulus  $X := B(0, R) \subset \mathbb{R}^d$  by

$$\rho(x) = \frac{1}{\|x\|^{d-1} \omega_{d-1}} \bar{\rho}(\|x\|),$$

where  $\omega_{d-1}$  denotes the surface volume of the unit sphere  $\mathbb{S}^{d-1}$ . Then  $\rho$  satisfies the weighted Poincaré–Wirtinger inequality for some positive constant.

## B Properties of the semi-discrete OT problem

### Regularity properties of $H$

In the main article, we concisely presented the regularity properties of the function  $H$ . In this section, we provide a more detailed breakdown of these properties, organizing them into sub-properties and referring to the corresponding proofs in the quadratic case with unbounded support (assumptions B1–B3).

- 638 • **Differentiability:** The function  $H$  is differentiable on the entire space  $\mathbb{R}^M$ , and we denote  
639 its gradient by  $\nabla H$  (see Proposition B.5).
- 640 • **Local  $C^2$  regularity:** There exists a radius  $r > 0$  such that  $H$  is twice continuously  
641 differentiable ( $C^2$ ) on the ball  $B(\mathbf{g}^*, r)$  (see Proposition B.5).
- 642 • **Local strong convexity:** The function  $H$  is strongly convex on the ball  $B(\mathbf{g}^*, r)$  (see  
643 Proposition B.12).
- 644 • **Hölder continuity of the Hessian:** If the density  $f_\mu$  is  $\alpha$ -Hölder continuous for some  
645  $\alpha \in (0, 1]$ , then the Hessian of  $H$  inherits this regularity and is also  $\alpha$ -Hölder continuous  
646 (see Corollary B.11).

## 647 B.1 Known results in the compact case

648 In this section, we recall known properties of the semi-dual semi-discrete problem when the support  
649 of the source measure  $\mu$  is  $c$ -convex and contained within a compact set and  $c$  is a cost satisfying the  
650 MTW properties. We will then extend these results to the non-compact case for the quadratic cost.

651 Here, we fix  $\varepsilon > 0$  and recall that  $K_\varepsilon := \{\mathbf{g} \in \mathbb{R}^M : \forall i \in \llbracket 1, M \rrbracket, \mu(\mathcal{L}_i(\mathbf{g})) \geq \varepsilon\}$ . The two  
652 theorems presented below are taken from [20] and have been adapted to our notation. We emphasize  
653 that the authors of [20] considered the semi-dual OT problem as a concave problem, studying the  
654 objective function  $-H$  instead of  $H$  under their notation. For a better understanding of the constants  
655 in their theorems, we refer the reader to their article.

656 **Proposition B.1** (Theorem 1.1 in [20]). *Let  $\mu$  be an absolutely continuous density with bounded  
657 support included in  $\mathbb{R}^d$ , then the functional  $H$  is  $C^1$  smooth, its gradient is given by*

$$\nabla H(\mathbf{g})_i = -\mu(\mathbb{L}_i^c(\mathbf{g})) + w_i ,$$

658 *and its Hessian by*

$$\begin{aligned} (i \neq j) \quad \nabla^2 H(\mathbf{g})_{ij} &= - \int_{\mathbb{L}_i(\mathbf{g}) \cap \mathbb{L}_j(\mathbf{g})} \frac{f_\mu(x)}{\|y_i - y_j\|} d\mathcal{H}^{d-1}(x), \\ \nabla^2 H(\mathbf{g})_{ii} &= - \sum_{j \neq i} \nabla^2 H(\mathbf{g})_{ij} . \end{aligned}$$

659 **Proposition B.2** (Theorem 5.1 in [20]). *Under the assumption (A1), that  $\mu$  satisfies a weighted  
660  $(1,1)$ -Poincaré–Wirtinger inequality, there exists a constant  $\lambda$  such that for any  $\mathbf{g} \in K_\varepsilon$ , the second  
661 smallest eigenvalue of  $\nabla^2 H(\mathbf{g})$ , denoted  $\lambda_2(\nabla^2 H(\mathbf{g}))$ , satisfies*

$$\lambda_2(\nabla^2 H(\mathbf{g})) > \lambda.$$

662 *That is,  $H$  is strongly convex on  $K_\varepsilon$ , considering the problem on  $\mathbf{1}^\perp$ .*

663 **Theorem B.3** (Theorem 1.3 in [20]). *If  $\mu$  has its density  $f_\mu$  in  $C^{0,\alpha}(\text{Supp}(\mu))$ . Then, the functional  
664  $H$  is  $C^{2,\alpha}$  on the set*

$$K_\varepsilon := \{\mathbf{g} \in \mathbb{R}^M, \forall i, \mu(\mathbb{L}_i(\mathbf{g})) > \varepsilon\} ,$$

665 Lastly, we state a result concerning the quantitative stability of Laguerre cells, as presented in [5].

666 **Lemma B.4** (Lemma 5.5 in [5]). *Under the same assumptions as in Proposition B.2, for  $\mathbf{g}, \mathbf{g}' \in \mathbb{R}^M$ ,  
667 we have*

$$\mu(\mathbb{L}_i^c(\mathbf{g}) \setminus \mathbb{L}_i^c(\mathbf{g}')) \lesssim M \|\mathbf{g} - \mathbf{g}'\|_\infty, \quad \forall i \in \llbracket 1, M \rrbracket .$$

668 Once again, we refer to [5] for a more detailed understanding of the constant involved in this lemma.

## 669 B.2 New properties for the non-compact case with the quadratic Euclidean cost

670 In this section, we give second order properties of the semi-dual when the source measure is not  
671 supported on a compact. In the compact case, this properties are already known as discussed in  
672 Appendix B.1.

For the reader's convenience, we recall the Assumptions that we made for the non-compact case.

**Assumption (Non-compact case) (B1)** The cost is quadratic:  $c(x, y) = \frac{1}{2}\|x - y\|^2$  and the measure  $\mu$  has a finite second-order moment.

**(B2)** There exists a compact set  $K \subset \mathbb{R}^d$  with  $\mu(K) \geq 1 - \frac{1}{4}w_{\min}$ , such that the probability measure  $\mu_K$  with density  $f_{\mu_K}(x) := c_K f_\mu(x) \mathbf{1}_K(x)$  satisfies a Poincaré-Wirtinger inequality.

**(B3)** The density  $f_\mu$  satisfies the following integrability and regularity condition: for  $R > 1$  and  $r \geq 1$ , define

$$f_\mu^R := f_\mu \cdot \mathbf{1}_{\|x\| \leq R}, \quad f_\mu^{R+r} := f_\mu \cdot \mathbf{1}_{R+(r-2) \leq \|x\| \leq R+r}.$$

Assume there exist  $C > 0$  and a modulus of continuity  $\omega$  such that for all  $\delta > 0$ ,

$$\sum_{r=0}^{\infty} (R+r)^{d-1} \omega_{f_\mu^{R+r}}(\delta) \leq C \omega(\delta), \quad \sum_{r=0}^{\infty} (R+r)^{d-1} C_{f_\mu^{R+r}} < \infty, \quad (6)$$

where  $C_{f_\mu^{R+r}} := \sup_{x \in \mathbb{R}^d} f_\mu^{R+r}(x)$  and  $\omega_{f_\mu^{R+r}}$  is the modulus of continuity of  $f_\mu^{R+r}$ .

**Additional notation.** Since here the cost is fixed, we define the Laguerre cells by  $\mathbb{L}_i(\mathbf{g})$  instead of  $\mathbb{L}_i^c(\mathbf{g})$ .

### B.2.1 Definition and regularity of the Hessian

**Proposition B.5.** Under Assumptions (B1) and (B3), the semi-dual  $H$  is differentiable everywhere, and its gradient is given by

$$\nabla H(\mathbf{g})_i = \mu(\mathbb{L}_i(\mathbf{g})) - w_i.$$

Moreover  $H$  is  $C^2$  smooth on  $K_{w_{\min}/2} \cap \mathcal{C}$  and its Hessian is given by

$$(i \neq j) \quad \nabla^2 H(\mathbf{g})_{ij} = - \int_{\mathbb{L}_i(\mathbf{g}) \cap \mathbb{L}_j(\mathbf{g})} \frac{f_\mu(x)}{\|y_i - y_j\|} d\mathcal{H}^{d-1}(x),$$

$$\nabla^2 H(\mathbf{g})_{ii} = - \sum_{j \neq i} \nabla^2 H(\mathbf{g})_{ij}.$$

*Proof. Definition of the gradient.* The proof follows the lines of the proof of Theorem 4.1 of [20] and extend this result to the non-compact case. If  $x$  is in the interior of Laguerre cell  $\mathbb{L}_j(\mathbf{g})$ , we have

$$\nabla_{\mathbf{g}} h(\mathbf{g}, x) = \mathbb{1}_{i=j} - w_i.$$

where we recall that  $h(\mathbf{g}, x) = -\mathbf{g}^c(x) - \sum_{i=1}^M w_i g_i$ . Since the boundaries of the Laguerre cells are defined by the intersections of  $M$  hyperplanes, they form a negligible set with respect to the measure  $\mu$ . As a result, the gradient definition of  $H$  follows immediately.

**Definition of the Hessian.** Fix  $i \in \llbracket 1, M \rrbracket$ . We aim to prove the differentiability of the measure  $\mu(\mathbb{L}_i(\mathbf{g}))$  with respect to  $g_j$  and that its differential is defined by:

$$\frac{\partial \mu(\mathbb{L}_i(\mathbf{g}))}{\partial g_j} = - \int_{\mathbb{L}_i(\mathbf{g}) \cap \mathbb{L}_j(\mathbf{g})} \frac{f_\mu(x)}{\|y_i - y_j\|} d\mathcal{H}^{d-1}(x), \quad j \neq i,$$

$$\frac{\partial \mu(\mathbb{L}_j(\mathbf{g}))}{\partial g_j} = - \sum_{i \neq j} \frac{\partial \mu(\mathbb{L}_i(\mathbf{g}))}{\partial g_j}.$$

This gives us exactly the line  $(\nabla^2 H(\mathbf{g})_{1i}, \dots, \nabla^2 H(\mathbf{g})_{Mi})$  of the Hessian.

**Suppose  $i \neq j$ .**

Suppose  $\delta \geq 0$ . Defining  $h_{ij}(x) := \frac{1}{2}\|x - y_i\|^2 - \frac{1}{2}\|x - y_j\|^2 - g_i + g_j$ , note that we have  $\mathbb{L}_i(\mathbf{g}) = \cap_j h_{ij}^{-1}([-\infty, 0])$ .

We also have  $\mathbb{L}_i(\mathbf{g} + \delta \mathbf{e}_j) = \mathbb{L}_i(\mathbf{g}) \setminus (\cap_{k \neq j} h_{ik}^{-1}([-\infty, 0]) \cap h_{ij}^{-1}([-\delta, 0]))$ . Note that  $h$  is Lipschitz and for all  $x$ ,  $\|\nabla h(x)\| = \|y_j - y_i\|$ . Moreover, under assumption (B3), we can use Lemma F.2,

699 which states that for all hyperplane  $H$ ,  $\int_H f_\mu d\mathcal{H}^{d-1} \lesssim 1$ . Therefore, we can apply the coarea formula  
700 to pass from the second to the third equality below,

$$\begin{aligned} \mu(\mathbb{L}_i(\mathbf{g} + \delta \mathbf{e}_j)) &= \mu(\mathbb{L}_i(\mathbf{g})) - \mu(\cap_{k \neq j} h_{ik}^{-1}([-\infty, 0]) \cap h_{ij}^{-1}([-\delta, 0])) \\ &= \mu(\mathbb{L}_i(\mathbf{g})) - \int_{\cap_{k \neq j} h_{ik}^{-1}([-\infty, 0]) \cap h_{ij}^{-1}([-\delta, 0])} f_\mu(x) dx \\ &= \mu(\mathbb{L}_i(\mathbf{g})) - \int_{-\delta}^0 \int_{\cap_{k \neq j} h_{ik}^{-1}([-\infty, 0]) \cap h_{ij}^{-1}(\{t\})} \frac{f_\mu(x)}{\|y_j - y_i\|} d\mathcal{H}^{d-1}(x) dt. \end{aligned}$$

701 By analogy, for  $\delta \leq 0$  we have:

$$\mathbb{L}_i(\mathbf{g} + \delta \mathbf{e}_j) = \mathbb{L}_i(\mathbf{g}) \cup (\cap_{k \neq j} h_{ik}^{-1}([-\infty, 0]) \cap h_{ij}^{-1}([-\delta, 0])),$$

702 Using the coarea formula gives:

$$\mu(\mathbb{L}_i(\mathbf{g} + \delta \mathbf{e}_j)) = \mu(\mathbb{L}_i(\mathbf{g})) + \int_0^{-\delta} \int_{\cap_{k \neq j} h_{ik}^{-1}([-\infty, 0]) \cap h_{ij}^{-1}(\{t\})} \frac{f_\mu(x)}{\|y_j - y_i\|} d\mathcal{H}^{d-1}(x) dt.$$

703 Applying Lemma B.6, which is stated and proved later in the appendice, the integrand defined above  
704 is continuous on  $K_{w_{\min}/2} \cap \mathcal{C}$ . As a consequence, we can apply the Fundamental Theorem of Calculus  
705 and justify the limit in

$$\lim_{\delta \rightarrow 0^-} \frac{\mu(\mathbb{L}_i(\mathbf{g} + \delta \mathbf{e}_j)) - \mu(\mathbb{L}_i(\mathbf{g}))}{\delta} = - \int_{\cap_{k \neq j} h_{ik}^{-1}([-\infty, 0]) \cap h_{ij}^{-1}(\{0\})} f_\mu(x) \frac{1}{\|y_j - y_i\|} d\mathcal{H}^{d-1}(x).$$

706 By symmetry

$$\lim_{\delta \rightarrow 0^+} \frac{\mu(\mathbb{L}_i(\mathbf{g} + \delta \mathbf{e}_j)) - \mu(\mathbb{L}_i(\mathbf{g}))}{\delta} = - \int_{\cap_{k \neq j} h_{ik}^{-1}([-\infty, 0]) \cap h_{ij}^{-1}(\{0\})} f_\mu(x) \frac{1}{\|y_j - y_i\|} d\mathcal{H}^{d-1}(x).$$

707 Since  $\cap_{k \neq j} h_{ik}^{-1}([-\infty, 0]) \cap h_{ij}^{-1}(\{0\}) = \mathbb{L}_i(\mathbf{g}) \cap \mathbb{L}_j(\mathbf{g})$ , we thus obtain

$$F_{ij}(\mathbf{g}) := \frac{\partial \mu(\mathbb{L}_i(\mathbf{g}))}{\partial g_j} = - \int_{\mathbb{L}_i(\mathbf{g}) \cap \mathbb{L}_j(\mathbf{g})} \frac{f_\mu(x)}{\|y_i - y_j\|} d\mathcal{H}^{d-1}(x), \quad j \neq i.$$

708 **Suppose**  $i = j$ . No matter  $\mathbf{g} \in \mathbb{R}^M$ , the Laguerre cells verifies  $\mu(\cup_i \mathbb{L}_i(\mathbf{g})) = \mu(\mathbb{R}^d) = 1$ .  
709 Therefore,

$$\frac{\partial}{\partial g_j} \sum_{i=1}^M \mu(\mathbb{L}_i(\mathbf{g})) = \frac{\partial}{\partial g_j} 1 = 0.$$

710 This equality gives  $\frac{\partial}{\partial g_j} \mu(\mathbb{L}_j(\mathbf{g})) = - \sum_{i \neq j} \frac{\partial}{\partial g_j} \mu(\mathbb{L}_i(\mathbf{g}))$ .

711

□

712 **Lemma B.6.** Under assumption (B1) and (B3), for any  $\mathbf{g} \in K_{w_{\min}/2} \cap \mathcal{C}$  the function  $F_{f_\mu}$  defined  
713 for all  $t \in \mathbb{R}$  as

$$F_{f_\mu}(t) = \int_{\cap_{k \neq j} h_{ik}^{-1}([-\infty, 0]) \cap h_{ij}^{-1}(\{t\})} \frac{f_\mu(x)}{\|y_j - y_i\|} d\mathcal{H}^{d-1}(x).$$

714 admits  $\omega$  as modulus of continuity in some neighborhood of  $\{0\}$ .

715 *Proof of Lemma B.6.* We keep the same notation as in [20]. Restricting ourselves to the quadratic  
716 cost, we get

$$\begin{aligned} \varepsilon_{nd} = \varepsilon_{tw} &= \min_{i \neq j} \|y_i - y_j\|, \\ C_{\nabla}^R &= O(R), \\ C_{exp} &= O(1), \\ C_{cond} &= O(1), \\ C_{det} &= O(1). \end{aligned}$$

717 In order to apply the results in [20], we need to extend Proposition 4.5 to measures with unbounded  
718 support in the case of the quadratic cost. We prove the following result:

719 **Proposition B.7.** Consider  $\mathcal{K}_\varepsilon := \{\mathbf{g} \in \mathbb{R}^{N-1} \mid \mu(\mathbb{L}_i(\mathbf{g})) > \varepsilon, \forall i = 1, \dots, M\}$  for some  $\varepsilon > 0$   
720 sufficiently small and let  $\mathcal{C}$  be the compact set of the projection. Then, there exists a positive  
721 constant  $\delta_1$ , such that for all  $\mathbf{g} \in \mathcal{K}_\varepsilon \cap \mathcal{C}$  and all  $p \in \mathbb{R}^d$  such that there exist  $i \neq j$ , for which  
722  $c(p, y_i) - c(p, y_0) = g_i - g_0$  and  $c(p, y_j) - c(p, y_0) = g_j - g_0$ , then

$$\left( \frac{\langle y_i - y_0, y_j - y_0 \rangle}{\|y_i - y_0\| \|y_j - y_0\|} \right)^2 \leq 1 - \delta_1^2. \quad (7)$$

723 *Remark B.8.* Note that the transversality equation (7) is independent of  $p \in \mathbb{R}^d$ . However,  $p$  is still  
724 involved in the transversality condition by the value of the difference of the costs.

725 *Proof.* Fix an index  $i$ . The set of points  $p \in \mathbb{R}^d$  such that  $c(p, y_i) - c(p, y_0) = g_i - g_0$  defines  
726 a hyperplane in  $\mathbb{R}^d$ . The intersection of two such hyperplanes, denoted  $H_{ij}(g)$ , is, unless the  
727 hyperplanes are parallel, a codimension-2 affine subspace of  $\mathbb{R}^d$ .

728 For each such  $H_{ij}(g)$ , let  $d_{ij}(g) \in \mathbb{R}^d$  be the orthogonal projection of the origin  $0_d$  onto  $H_{ij}(g)$ .  
729 Since the vector of potentials  $(g_i)_{i=0, \dots, M-1}$  is bounded due to the projection set  $\mathcal{C}$ , the set

$$\{d_{ij}(g) : i \neq j \text{ admissible, and } g \in \mathcal{K}_\varepsilon \cap \mathcal{C}\}$$

730 is contained in a ball  $B(0, R - 1)$  for some sufficiently large  $R > 0$ .

731 Hence, for every  $g \in \mathcal{K}_\varepsilon \cap \mathcal{C}$  and every admissible pair  $(i, j)$ , there exists a point  $p \in H_{ij}(g)$  lying in  
732 the interior of the ball  $B(0, R)$ .

733 We now apply the transversality result from [20] to the measure

$$\mu_R := \mathbf{1}_{B(0, R)} \cdot \frac{\mu}{\mu(B(0, R))},$$

734 which is the normalized restriction of  $\mu$  to  $B(0, R)$ . This result guarantees transversality of the  
735 hyperplanes  $H_{ij}$  associated with potentials in the set  $\mathcal{K}'_{\varepsilon'}$  (defined analogously for  $\mu_R$  and some  
736  $\varepsilon' > 0$ ) over the whole space  $\mathbb{R}^d$ .

737 Choose  $R$  such that  $\mu(B(0, R)) \geq 1 - \varepsilon/2$ . Then it is sufficient to take

$$\varepsilon' = \frac{\varepsilon/2}{1 - \varepsilon/2},$$

738 since one can check that  $\mathcal{K}_\varepsilon \subset \mathcal{K}'_{\varepsilon'}$ . This completes the proof.  $\square$

739 We aim to use the transversality result of Kitagawa et al. on a decomposition of  $\mathbb{R}^d$  into balls centered  
740 at 0. To this goal, we now prove a transversality result at the boundary of  $B(0, R)$  uniform for  $R$   
741 sufficiently large.

742 **Proposition B.9.** Consider  $\mathcal{K}_\varepsilon := \{\mathbf{g} \in \mathbb{R}^{N-1} \mid \mu(\mathbb{L}_i(\mathbf{g})) > \varepsilon, \forall i = 1, \dots, M\}$  for some  $\varepsilon > 0$   
743 sufficiently small and let  $\mathcal{C}$  be the compact set of the projection. Then, for any positive constant  $\delta_2$   
744 there exists  $R$  sufficiently large such that for all  $\mathbf{g} \in \mathcal{K}_\varepsilon \cap \mathcal{C}$  and all  $p \in \mathbb{R}^d$ : if there exists  $i$  such that  
745  $c(p, y_i) - c(p, y_0) = g_i - g_0$  for some  $p \in \partial B(0, R)$ , then

$$\left\langle \frac{p}{\|p\|}, \frac{y_i - y_0}{\|y_i - y_0\|} \right\rangle \leq 1 - \delta_2^2. \quad (8)$$

746 *Proof.* Rewrite the condition  $c(p, y_i) - c(p, y_0) = g_i - g_0$  as  $\langle p, y_i - y_0 \rangle = g_i - g_0$ , dividing by  
747  $\|p\|$  we get

$$\left\langle \frac{p}{\|p\|}, y_i - y_0 \right\rangle = \frac{g_i - g_0}{\|p\|}. \quad (9)$$

748 The right hand side tends to 0 uniformly with  $R$  since  $g_i - g_0$  lies in a compact set. The conclusion  
749 follows directly.  $\square$

750 The rest of the proof follows the lines of the proofs Appendix B of [20] with  $\varepsilon_{tr} = \delta_1$  as in Proposition  
 751 B.7. From Proposition B.9 applied to  $\delta_2 = \delta_1$  there exists  $R > 1$  such as the transversality condition  
 752 on the boundary (8) holds for every  $B(0, R + r)$  and the same  $\delta_1$  for every  $r \geq 0$ . Let us fix such  
 753  $R > 1$  so that Assumption (5) is also satisfied.

754 The next step is to decompose the integral using a partition of unity. We define the sequence of  
 755 functions  $(\varphi_r)_{r \geq 0}$  by

$$\varphi_r(x) = \begin{cases} (R - \|x\|)_+ \wedge 1, & \text{if } r = 0, \\ ((\|x\| - (R + r - 2))_+ \wedge (R + r - \|x\|)_+), & \text{if } r \geq 1, \end{cases} \quad x \in \mathbb{R}^d.$$

756 An illustration of the functions  $\varphi_r(x)$  defined above is shown below:

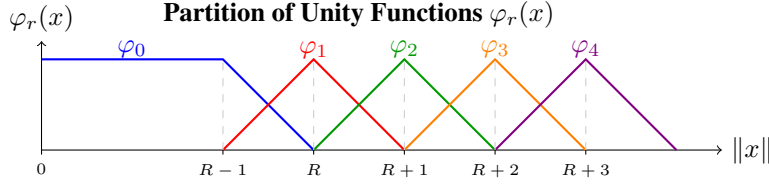

757

758 By definition,  $\sum_{r \geq 0} \varphi_r(x) = 1$ , for all  $x \in \mathbb{R}^d$ , and every  $\varphi_r$  is supported on  $\{R + r - 2 \leq \|x\| \leq$   
 759  $R + r\}$  for every  $r \geq 1$ ,  $\varphi_0$  being supported by  $B(0, R)$ . Moreover  $\varphi_r$  is Lipschitz continuous and we  
 760 denote  $\omega_{\varphi_r}$  its modulus of continuity on its support. The moduli of continuity satisfy  $\omega_{\varphi_r}(\delta) \leq |\delta|$ ,  
 761  $\delta > 0$   $r \geq 0$ . Then we decompose the integral

$$\int_{\cap_{k \neq j} h_{ik}^{-1}(-\infty, 0] \cap h_{ij}^{-1}(\{t\})} \frac{f_\mu(x)}{\|y_j - y_i\|} d\mathcal{H}^{d-1}(x) = \sum_{r=0}^{\infty} \int_{\cap_{k \neq j} h_{ik}^{-1}(-\infty, 0] \cap h_{ij}^{-1}(\{t\})} \frac{f_\mu(x) \varphi_r(x)}{\|y_j - y_i\|} d\mathcal{H}^{d-1}(x). \quad (10)$$

762 We apply Proposition B.1 of [20] to each term of the decomposition. We recall below his crucial  
 763 result, tracking the order of the constants established by [20].

**Proposition B.10.** *Let  $\sigma$  be a continuous non-negative function on  $B(0, R)$  bounded by  $\sigma_\infty$  and with modulus of continuity  $\omega_\sigma$ . Let the functions  $h_{ij}$  satisfy the transversality conditions (7) and (8) with the same constant  $\varepsilon_{tr} > 0$ . Then*

$$F_\sigma(t) := \int_{\cap_{k \neq j} h_{ik}^{-1}(-\infty, 0] \cap h_{ij}^{-1}(\{t\})} \frac{\sigma(x)}{\|y_j - y_i\|} d\mathcal{H}^{d-1}(x)$$

has modulus of continuity

$$\omega_{h_\sigma}(\delta) = C_1 \omega_\sigma(C_2 \delta) + C_3 |\delta|$$

764 where  $C_1 = O(\mathcal{H}^{d-1}(\partial B(0, R)))$ ,  $\mathcal{H}^{d-1}(\partial B(0, R)) = O(R^{d-1})$ ,  $C_2 = O(\varepsilon_{tr}^{-1}) = O(1)$  and  
 765  $C_3 = O(\sigma_\infty C(d, 2R) \varepsilon_{tr}^{-4} + \mathcal{H}^{d-1}(\partial B(0, R)))$ , where  $C(d, 2R)$  defined in (3.5) of [20] satisfies  
 766  $C(d, 2R) = O(R^{d-1})$ .

When applying Proposition B.10 to the continuous function  $\sigma^{R+r}(x) := f_\mu(x) \varphi_r(x)$  we easily estimate  $\sigma_\infty^{R+r} \leq C_{f_\mu}^{R+r}$  and  $w_{\sigma^{R+r}} \leq \omega_{f_\mu}^{R+r} + C_{f_\mu}^{R+r} \omega_{\varphi_r}$ . Using that  $\omega_{\varphi_r}(\delta) \leq |\delta|$  we obtain:

$$\omega_{h_{\sigma^{R+r}}}(\delta) = O((R+r)^{d-1}) \left( \omega_{f_\mu}^{R+r}(O(1)\delta) + O(C_{f_\mu}^{R+r})\delta \right),$$

uniformly for every  $\mathbf{g} \in \mathcal{K}_\varepsilon \cap \mathcal{C}$  on a neighborhood of  $\{0\}$ . Noticing that this neighborhood depends solely on the transversality properties that are common to every  $r \geq 0$  and since

$$\omega_{F_{f_\mu}} = \sum_{r \geq 0} \omega_{h_{\sigma^{R+r}}}$$

767 from the decomposition in (10) the desired result follows under the assumption in (5).  $\square$

768 **Corollary B.11.** *Under Assumptions (B1) and (B3), if moreover  $f_\mu$  is  $\alpha$ -Hölder with  $\alpha \in (0, 1]$ , then*  
 769 *the Hessian of the semi-dual  $H$  is also  $\alpha$ -Hölder on  $K_{w_{\min}/2} \cap \mathcal{C}$ .*



770 *Proof.* Since  $f_\mu$  is  $\alpha$ -Hölder, the function  $f_\mu^{R+r}$  with  $r \geq 0$  are also  $\alpha$ -Hölder and we note  $\omega_{f_\mu}^{R+r} =$   
 771  $\kappa_{f_\mu}^{R+r} \delta^\alpha$ , applying Proposition B.10,

$$\begin{aligned} & \omega_{h_{\sigma R+r}}(\delta) O((R+r)^{d-1}) \left( \omega_{f_\mu}^{R+r}(O(1)\delta) + O(C_{f_\mu}^{R+r})\delta \right) \\ &= O((R+r)^{d-1}) \kappa_{f_\mu}^{R+r} O(1)\delta^\alpha + ((R+r)^{d-1}) O(C_{f_\mu}^{R+r})\delta. \end{aligned}$$

772 By the summability conditions of assumption (B3), for some constants  $C_1, C_2 > 0$ , we have

$$\begin{aligned} \omega_{F_{f_\mu}} &= \sum_{r \geq 0} \omega_{h_{\sigma R+r}} \\ &= O(1)\delta^\alpha \sum_{r \geq 0} O((R+r)^{d-1}) \kappa_{f_\mu}^{R+r} + \delta \sum_{r \geq 0} O(C_{f_\mu}^{R+r}) ((R+r)^{d-1}) \\ &\leq C_1 \delta^\alpha + C_2 \delta, \end{aligned}$$

773 Applying Proposition B.3 in [20] under our hypothesis shows that for  $\mathbf{g}, \mathbf{g}' \in K_{w_{\min}/2} \cap \mathcal{C}$ , there  
 774 exists a constant  $C$  depending on  $\varepsilon_{tr}$  and  $f_\mu$  such that we have

$$|\nabla^2 H(\mathbf{g}) - \nabla^2 H(\mathbf{g}')| \leq \omega_{F_{f_\mu}}(\|\mathbf{g} - \mathbf{g}'\|_\infty) + C\|\mathbf{g} - \mathbf{g}'\|$$

775 which gives the  $\alpha$ -Hölder regularity since  $\omega_{F_{f_\mu}} \leq C_1 \delta^\alpha + C_2 \delta$ . □

## 776 B.2.2 Local strong convexity with respect to the mass of Laguerre cells

777 **Proposition B.12.** *Under Assumptions (B1-B3)  $H$  is strongly convex on  $K_{\frac{1}{2}w_{\min}}$ .*

778 *Proof.* Recall  $K \subset \mathbb{R}^d$  the compact set such that  $\mu(K) > 1 - \frac{1}{4}w_{\min}$  and  $\mu_K$ , the probability  
 779 measure with density defined by  $f_{\mu_K}(x) = c_K f_\mu(x) \mathbf{1}_K(x)$ , with  $c_K \in [1, 2]$ , satisfies a weighted  
 780 Poincaré-Wirtinger inequality.

We thus can use Proposition B.2, which states that the semi-dual between  $\mu_R$  and  $\nu$  is strongly-convex on  $\text{Vect}_1^\perp$  on the set

$$K_{\frac{1}{4}w_{\min}}^R := \left\{ \mathbf{g} \in \mathbb{R}^M : \forall i \in \llbracket 1, M \rrbracket, \mu_R(\mathbb{L}_i^R(\mathbf{g})) \geq \frac{1}{4}w_{\min} \right\}.$$

781 This gives us that, for any  $\mathbf{g} \in K_{\frac{1}{4}w_{\min}}^R$ , there exists  $\lambda_K > 0$ , lower bounding the second smallest  
 782 value of the semi-dual function between  $\mu_R$  and  $\nu$ . This also gives us that for any  $\mathbf{g} \in K_{\frac{1}{4}w_{\min}}^R$ , the  
 783 second smallest eigenvalue of the matrix  $B$  defined by

$$\begin{aligned} (i \neq j) \quad B_{ij} &= - \int_{\mathbb{L}_i(\mathbf{g}) \cap \mathbb{L}_j(\mathbf{g})} \frac{f_\mu(x) \mathbf{1}_{B(0,R)}(x)}{\|y_i - y_j\|} d\mathcal{H}^{d-1}(x), \\ B_{ii} &= - \sum_{j \neq i} B_{ij}, \end{aligned}$$

784 is lower bounded by  $\lambda_K/c_R \geq \lambda_K/2 > 0$ .

785 Since for any  $\mathbf{g}$ , and  $i \neq j$ ,  $\nabla^2 H(\mathbf{g})_{ij} \leq B_{ij}$  and that both  $\nabla^2 H(\mathbf{g})$  and  $B$  are Laplacian matrices,  
 786 we apply Lemma F.1 to obtain that the second smallest eigenvalue of the hessian  $\nabla^2 H$  is lower  
 787 bounded by  $\lambda_R/c_R$  on  $K_{\frac{1}{4}w_{\min}}^R$ .

788 For any  $\mathbf{g} \in K_{w_{\min}/2}$ , we thus have for all  $i \in \llbracket 1, M \rrbracket$ ,  $\mu(\mathbb{L}_i(\mathbf{g}) \cap B(0, R)) \geq \frac{1}{4}w_{\min}$ . That is,  
 789  $K_{\frac{1}{2}w_{\min}} \subset K_{\frac{1}{4}w_{\min}}^R$ , which completes the proof. □

## 790 B.2.3 Quantitative stability of the Laguerre cells

791 **Lemma B.13.** *Under Assumptions (B1-B3), we have*

$$\mu(\mathbb{L}_i^c(\mathbf{g}) \setminus \mathbb{L}_i^c(\mathbf{g}')) \lesssim M\|\mathbf{g} - \mathbf{g}'\|_\infty, \quad \forall i \in \llbracket 1, M \rrbracket.$$

792 *Proof.* For all  $j \in \llbracket 1, M \rrbracket$ , if  $x$  is in the interior of  $\mathbb{L}_j(\mathbf{g})$ , we have

$$\nabla \mathbf{g}^c(x) = x - y_j. \quad (11)$$

793 Therefore, given  $\mathbf{g}, \mathbf{g}' \in \mathbb{R}^M$ , if there exists  $j \in \llbracket 1, M \rrbracket$  such that  $x$  is the interior of  $\mathbb{L}_j(\mathbf{g}) \cap \mathbb{L}_j(\mathbf{g}')$   
794 we have

$$\nabla \mathbf{g}^c(x) = \nabla (\mathbf{g}')^c(x).$$

795 Moreover, since the support of  $\nu$  is finite, we have

$$\sup_{x \in \mathbb{R}^d} \|\nabla \mathbf{g}^c(x) - \nabla (\mathbf{g}')^c(x)\| = \max_{i \neq j} \|y_i - y_j\|.$$

796 Hence, to bound the error of  $T(\mathbf{g})(x) = x - \nabla \mathbf{g}^c(x)$  and  $T_{\mu, \nu} = x - \nabla (\mathbf{g}^*)^c(x)$ , we just need to  
797 bound the difference of measure of Laguerre cells made by  $\mathbf{g}$  and  $\mathbf{g}^*$ . More generally, we now proceed  
798 here to bound the difference of measure of Laguerre cells between  $\mathbf{g}, \mathbf{g}' \in \mathbb{R}^M$  fixed arbitrarily.

799 Our proof will follow some arguments from [20]. Let us fix  $i \in \llbracket 1, M \rrbracket$  and suppose  $x \in \mathbb{L}_i(\mathbf{g}) \setminus$   
800  $\mathbb{L}_i(\mathbf{g}')$ . The definition of the Laguerre cells implies that there is a  $k \neq i$  such that  $c(x, y_k) + \mathbf{g}'_k <$   
801  $c(x, y_i) + \mathbf{g}'_i$  while  $c(x, y_i) + \mathbf{g}_i \leq c(x, y_k) + \mathbf{g}_k$ . Combining these two inequalities yields to

$$\mathbf{g}'_k - \mathbf{g}'_i < c(x, y_i) - c(x, y_k) \leq \mathbf{g}_k - \mathbf{g}_i.$$

802 Hence, writing  $f_{ik}(x) = c(x, y_i) - c(x, y_k)$ , we have

$$\mathbb{L}_i(\mathbf{g}) \setminus \mathbb{L}_i(\mathbf{g}') \subset \bigcup_{k \neq i} f_{ik}^{-1}([\mathbf{g}'_k - \mathbf{g}'_i, \mathbf{g}_k - \mathbf{g}_i]). \quad (12)$$

803 We now now bound  $\mu(f_{ik}^{-1}([\mathbf{g}'_k - \mathbf{g}'_i, \mathbf{g}_k - \mathbf{g}_i]))$  using the coarea formula, using that for all  $x$ ,  
804  $\|\nabla f_{ik}(x)\| = \|y_i - y_k\|$ :

$$\begin{aligned} \mu(f_{ik}^{-1}([a, b])) &= \int_{f_{ik}^{-1}([a, b])} d\mu(x) \\ &= \int_a^b \int_{f_{ik}^{-1}(\{t\})} \frac{1}{\|\nabla f_{ik}(x)\|} \mu(x) d\mathcal{H}^{d-1}(x) dt \\ &= \int_a^b \int_{f_{ik}^{-1}(\{t\})} \frac{1}{\|y_i - y_k\|} \mu(x) d\mathcal{H}^{d-1}(x) dt. \end{aligned}$$

805 Observe that for the quadratic cost,  $f_{ik}(x) = \langle x, y_k - y_i \rangle + \|y_i\|^2 - \|y_k\|^2$  and so  $f_{ik}^{-1}(\{t\}) =$   
806  $\{x \in \mathbb{R}^d, \langle x, y_k - y_i \rangle = t - \frac{1}{2}(\|y_i\|^2 + \|y_k\|^2)\}$  and is therefore a hyperplane. Applying Lemma  
807 F.2, there exists a constant  $C$  such that, for any  $i, k$  and  $t$ , we have

$$\int_{f_{ik}^{-1}(\{t\})} \frac{1}{\|y_i - y_k\|} \mu(x) d\mathcal{H}^{d-1}(x) \leq C.$$

808 Therefore, we have

$$\mu(f_{ik}^{-1}([a, b])) \leq \int_a^b \frac{C}{\|y_i - y_k\|} \leq (b - a) \frac{C}{\|y_i - y_k\|}.$$

809 Since  $\mathbf{g}_k - \mathbf{g}_i - (\mathbf{g}'_k - \mathbf{g}'_i) \leq 2\|\mathbf{g} - \mathbf{g}'\|_\infty$ , by combining the above with (12) we conclude

$$\mu(\mathbb{L}_i(\mathbf{g}) \setminus \mathbb{L}_i(\mathbf{g}')) \leq \sum_{k \neq i} \mu(f_{ik}^{-1}([\mathbf{g}'_k - \mathbf{g}'_i, \mathbf{g}_k - \mathbf{g}_i])) \lesssim M \|\mathbf{g} - \mathbf{g}'\|_\infty. \quad (13)$$

810 □

### 811 B.3 New properties in both our compact and non compact settings

812 **Theorem 5.1.** Under Assumptions (A1) or (B1-3), the function  $\mathbf{g} \mapsto \|T(\mathbf{g}) - T_{\mu,\nu}\|_{L^2(\mu)}^2$  is Lipschitz  
 813 with respect to the infinity norm  $\|\cdot\|_\infty$ . Moreover, the Lipschitz constant grows at most quadratically  
 814 in  $M$ .

815 *Proof.* Using that no matter  $\mathbf{g} \in \mathbb{R}^M$ , for any  $x \in \mathbb{R}^d$

$$\|T_{\mu,\nu}(\mathbf{g}^*) - T_{\mu,\nu}(\mathbf{g})\| \leq \begin{cases} 0 & \text{if } x \in \mathbb{L}_i(\mathbf{g}^*) \cap \mathbb{L}_i(\mathbf{g}) \text{ for a certain } i \in \llbracket 1, M \rrbracket, \\ \max_{i \neq j} \|y_i - y_j\| & \text{else,} \end{cases}$$

816 and that for any  $\mathbf{g}, \mathbf{g}' \in \mathbb{R}^M$ , we have  $\mu(\mathbb{L}_i(\mathbf{g}) \setminus \mathbb{L}_i(\mathbf{g}')) \lesssim M\|\mathbf{g} - \mathbf{g}'\|$  using Proposition B.4 in the  
 817 compact case, or Proposition B.13, we have for any  $p \in [1, \infty)$

$$\begin{aligned} \|T_{\mu,\nu}(\mathbf{g}^*) - T_{\mu,\nu}(\mathbf{g})\|_{L^p(\mu)}^p &= \int_{\mathbb{R}^d} \|T_{\mu,\nu}(\mathbf{g}^*)(x) - T_{\mu,\nu}(\mathbf{g})(x)\|^p d\mu(x) \\ &= \sum_{i=1}^M \int_{\mathbb{L}_i(\mathbf{g}^*)} \|T_{\mu,\nu}(\mathbf{g}^*)(x) - T_{\mu,\nu}(\mathbf{g})(x)\|^p d\mu(x) \\ &\leq \sum_{i=1}^M \int_{\mathbb{L}_i(\mathbf{g}^*) \setminus \mathbb{L}_i(\mathbf{g})} \max_{i \neq j} \|y_i - y_j\|^p d\mu(x) \\ &\leq \sum_{i=1}^M \max_{i \neq j} \|y_i - y_j\|^p \mu(\mathbb{L}_i(\mathbf{g}^*) \setminus \mathbb{L}_i(\mathbf{g})) \\ &\lesssim M^2 \|\mathbf{g}^* - \mathbf{g}\|_\infty, \end{aligned}$$

818 where we used  $\mu(\mathbb{L}_i(\mathbf{g}) \setminus \mathbb{L}_i(\mathbf{g}^*)) \lesssim M\|\mathbf{g} - \mathbf{g}^*\|$  for the last line.

819

□

820 **Lemma B.14.** For any  $\varepsilon > 0$ , there exists  $\mathbf{g}^* \in K_\varepsilon$  and  $d_\varepsilon > 0$  such that  $B(\mathbf{g}^*, d_\varepsilon) \subset K_\varepsilon$ .

821 *Proof.* This result is a simple application of the results on the quantitative stability of Laguerre cells  
 822 stated in Proposition B.4 and Proposition B.13. □

823 **Proposition B.15.** (Hessian and Local strong convexity). Under Assumptions (A1) or (B1-3),  $H$  is  
 824 twice differentiable. Moreover, there exists a constant  $\lambda > 0$  and a radius  $r > 0$ , such that for any  
 825  $\mathbf{g} \in \mathbb{R}^M$ ,  $\|\mathbf{g}^* - \mathbf{g}\|_v \leq r$  implies that the second smallest value of the Hessian  $\nabla^2 H(\mathbf{g})$  is lower  
 826 bounded by  $\lambda$ .

827 *Proof.* The fact that  $H$  is twice differentiable was already known in the compact case and is proven  
 828 in Proposition B.5 for the non compact case under (B1-3).

829 Under assumptions (A1) and using Proposition B.2 or under assumptions (B1-3) and using Proposition  
 830 B.12,  $H$  is strongly convex on  $K_{\frac{1}{2}w_{\min}}$ . Applying Lemma B.14 concludes the proof. □

831 **Proposition B.16.** There exists  $\eta > 0$ , such that uniformly in  $\mathbf{g} \in \mathcal{C}$ , we have

$$\langle \nabla H(\mathbf{g}), \mathbf{g} - \mathbf{g}^* \rangle_v \geq \eta \|\mathbf{g} - \mathbf{g}^*\|_v^2.$$

832 *Proof.* Observe that, by Proposition B.12,  $H$  is locally strongly convex on the orthogonal of  $\mathbf{1}$ , on  
 833 the set

$$K_{\frac{1}{2}w_{\min}} = \left\{ \mathbf{g} : \forall i \in \llbracket 1, M \rrbracket, \mu(\mathbb{L}_i(\mathbf{g})) \geq \frac{1}{2}w_{\min} \right\}.$$

834 Therefore, for any  $\mathbf{g} \in K_{\frac{1}{2}w_{\min}}$ , we have  $\langle \nabla H(\mathbf{g}), \mathbf{g} - \mathbf{g}^* \rangle_v \geq \lambda \|\mathbf{g} - \mathbf{g}^*\|_v^2$ .

835 Now, suppose  $\mathbf{g} \in \mathcal{C} \setminus K_{\frac{1}{2}w_{\min}}$ . Using Lemma B.14, we know that there exists  $d_0 > 0$  such that  
 836  $B(\mathbf{g}^*, d_0) \subset K_{\frac{1}{2}w_{\min}}$ . Therefore, by the convexity of  $H$ , there exists  $c > 0$  such that

$$\langle \nabla H(\mathbf{g}), \mathbf{g} - \mathbf{g}^* \rangle_v \geq H(\mathbf{g}) - H(\mathbf{g}^*) > c.$$

837 Defining

$$\lambda' := \inf_{\mathbf{g} \in \mathcal{C} \setminus K_{\frac{1}{2}w_{\min}}} \left\{ \frac{H(\mathbf{g}) - H(\mathbf{g}^*)}{\|\mathbf{g} - \mathbf{g}^*\|_v^2} \right\} > c/\text{Diam}_2(\mathcal{C})^2,$$

838 we have for any  $\mathbf{g} \in \mathcal{C} \setminus K_{\frac{1}{2}w_{\min}}$

$$\langle \nabla H(\mathbf{g}), \mathbf{g} - \mathbf{g}^* \rangle_v \geq \lambda' \|\mathbf{g} - \mathbf{g}^*\|_v^2.$$

839 Taking  $\eta = \min \{\lambda, \lambda'\}$  concludes the proof.  $\square$

## 840 C Proofs of the convergence rates of PSGD

### 841 C.1 Fast convergence rates for MTW costs

#### 842 C.1.1 Convergence of the non-averaged iterates.

843 **Theorem 4.5** (Non averaged iterates). Under Assumptions (A1) or (B1-3) and for any decay step of  
844 the form  $\gamma_n = \gamma_1/n^b$  with  $\gamma_1 > 0, b \in (1/2, 1)$ , we have the convergence rate

$$\mathbb{E}[\|\mathbf{g}_n - \mathbf{g}^*\|_v^2] = \mathcal{O}\left(\frac{\gamma_n}{\eta}\right).$$

845 *Proof.* By definition of the gradient step at time  $n + 1$ , sampling  $X_{n+1} \sim \mu$  and since  $\mathbf{g}^* \in \mathcal{C}$ , we  
846 have  $\|\nabla_{\mathbf{g}} h(\mathbf{g}_n, X_{n+1})\|_v \leq 2$  a.s. and

$$\begin{aligned} \|\mathbf{g}_{n+1} - \mathbf{g}^*\|_v^2 &= \|\text{Proj}_{\mathcal{C}}(\mathbf{g}_n - \gamma_{n+1} \nabla_{\mathbf{g}} h(\mathbf{g}_n, X_{n+1})) - \mathbf{g}^*\|_v^2 \\ &\leq \|\mathbf{g}_n - \gamma_{n+1} \nabla_{\mathbf{g}} h(\mathbf{g}_n, X_{n+1}) - \mathbf{g}^*\|_v^2 \\ &\leq (\|\mathbf{g}_n - \mathbf{g}^*\|_v^2 - 2\gamma_{n+1} \langle \nabla_{\mathbf{g}} h(\mathbf{g}_n, X_{n+1}), \mathbf{g}_n - \mathbf{g}^* \rangle_v + \gamma_{n+1}^2 \|\nabla_{\mathbf{g}} h(\mathbf{g}_n, X_{n+1})\|_v^2) \\ &\leq (\|\mathbf{g}_n - \mathbf{g}^*\|_v^2 - 2\gamma_{n+1} \langle \nabla_{\mathbf{g}} h(\mathbf{g}_n, X_{n+1}), \mathbf{g}_n - \mathbf{g}^* \rangle_v + 4\gamma_{n+1}^2). \end{aligned} \quad (14)$$

847 Using Proposition B.16, we have for any  $\mathbf{g} \in \mathcal{C}$ ,  $\langle \nabla H(\mathbf{g}), \mathbf{g} - \mathbf{g}^* \rangle_v \geq \eta \|\mathbf{g} - \mathbf{g}^*\|_v^2$ . Therefore,  
848 taking the conditional expectation, we obtain

$$\mathbb{E}[\|\mathbf{g}_{n+1} - \mathbf{g}^*\|_v^2 \mid \mathcal{F}_n] \leq \|\mathbf{g}_n - \mathbf{g}^*\|_v^2 (1 - 2\eta\gamma_{n+1}) + 4\gamma_{n+1}^2.$$

849 Taking the expectation and applying Lemma F.3 with  $\delta_n = \mathbb{E}[\|\mathbf{g}_n - \mathbf{g}^*\|_v^2]$  and  $m_n = 4\gamma_n$  gives

$$\mathbb{E}[\|\mathbf{g}_{n+1} - \mathbf{g}^*\|_v^2] \leq \exp\left(-2\eta \sum_{k=\lceil n/2 \rceil}^n \gamma_k\right) \left(\sum_{n=n_0}^n 4\gamma_n^2 + \mathbb{E}[\|\mathbf{g}_{n_0} - \mathbf{g}^*\|_v^2]\right) + \frac{4}{\eta} \gamma_{\lceil n/2 \rceil - 1}$$

850 where  $n_0 = \min\{n \in \mathbb{N}, \eta\gamma_{n+1} \leq 1\}$ . Remark that the exponential term converges exponentially  
851 fast. Indeed, we have  $\sum_{k=\lceil n/2 \rceil}^n \gamma_k \gtrsim n^{1-b}$  with  $1 - b > 0$ . Moreover,  $\|\mathbf{g}_{n_0} - \mathbf{g}^*\|_v^2 \leq \text{Diam}_2(\mathcal{C})^2$ .  
852 Therefore, since for all  $n \geq 2$ ,  $\gamma_{\lceil n/2 \rceil - 1} \leq 2^b \gamma_n$ , we have the desired convergence rate

$$\mathbb{E}[\|\mathbf{g}_{n+1} - \mathbf{g}^*\|_v^2] \lesssim \frac{\gamma_n}{\eta}$$

853 which concludes the proof.  $\square$

#### 855 C.1.2 Convergence rate for higher order moments of the non-averaged iterates.

856 We prove here the convergence rate of higher order moments of the error  $\|\mathbf{g}_n - \mathbf{g}^*\|_v$ . This conver-  
857 gence will be useful for the convergence rate of the averaged iterates of PSGD. While this proposition  
858 directly proves Theorem 4.4 by the use of Jensen's inequality, the proof is slightly more cumbersome  
859 so we decided to make a separate case.

860 **Proposition C.1.** *Under Assumptions (A1) or (B1-3) and for any decay step of the form  $\gamma_n = \gamma_1/n^b$*   
 861 *with  $\gamma_1 > 0, b \in (1/2, 1)$  and  $p \in \{1, 2, 3\}$ , we have the convergence rate*

$$\mathbb{E} [\|\mathbf{g}_n - \mathbf{g}^*\|^p] \lesssim \frac{\gamma_n^p}{\eta^p}$$

862 *where  $(\mathbf{g}_n)$  is the sequence of non-averaged iterates of PSGD.*

863 *Proof.* By definition of the gradient step at time  $n + 1$ , sampling  $X_{n+1} \sim \mu$  and using inequality  
 864 (14),

$$\|\mathbf{g}_{n+1} - \mathbf{g}^*\|_v^6 \leq (\|\mathbf{g}_n - \mathbf{g}^*\|_v^2 - 2\gamma_{n+1} \langle \nabla_{\mathbf{g}} h(\mathbf{g}_n, X_{n+1}), \mathbf{g}_n - \mathbf{g}^* \rangle_v + 4\gamma_{n+1}^2)^3.$$

865 Using that  $(A + B + C)^3 = \sum_{a+b+c=3} \frac{3!}{a!b!c!} A^a B^b C^c$ , we obtain

$$\begin{aligned} \|\mathbf{g}_{n+1} - \mathbf{g}^*\|_v^6 &\leq \|\mathbf{g}_n - \mathbf{g}^*\|_v^6 \\ &\quad - 6\|\mathbf{g}_n - \mathbf{g}^*\|_v^4 \gamma_{n+1} \langle \nabla_{\mathbf{g}} h(\mathbf{g}_n, X_{n+1}), \mathbf{g}_n - \mathbf{g}^* \rangle_v \\ &\quad + 12\|\mathbf{g}_n - \mathbf{g}^*\|_v^4 \gamma_{n+1}^2 \\ &\quad + 12\|\mathbf{g}_n - \mathbf{g}^*\|_v^2 \gamma_{n+1}^2 \langle \nabla_{\mathbf{g}} h(\mathbf{g}_n, X_{n+1}), \mathbf{g}_n - \mathbf{g}^* \rangle_v^2 \\ &\quad - 48\|\mathbf{g}_n - \mathbf{g}^*\|_v^2 \gamma_{n+1}^3 \langle \nabla_{\mathbf{g}} h(\mathbf{g}_n, X_{n+1}), \mathbf{g}_n - \mathbf{g}^* \rangle_v \\ &\quad + 48\|\mathbf{g}_n - \mathbf{g}^*\|_v^2 \gamma_{n+1}^4 \\ &\quad - 8\gamma_{n+1}^3 \langle \nabla_{\mathbf{g}} h(\mathbf{g}_n, X_{n+1}), \mathbf{g}_n - \mathbf{g}^* \rangle_v^3 \\ &\quad + 48\gamma_{n+1}^4 \langle \nabla_{\mathbf{g}} h(\mathbf{g}_n, X_{n+1}), \mathbf{g}_n - \mathbf{g}^* \rangle_v^2 \\ &\quad - 96\gamma_{n+1}^5 \langle \nabla_{\mathbf{g}} h(\mathbf{g}_n, X_{n+1}), \mathbf{g}_n - \mathbf{g}^* \rangle_v \\ &\quad + 2^6 \gamma_{n+1}^6. \end{aligned}$$

866 Taking the conditional expectation and already omitting some negative terms thanks to  
 867  $\langle \nabla H(\mathbf{g}_n), \mathbf{g}_n - \mathbf{g}^* \rangle_v \geq 0$ , which follows from the fact that  $H$  is convex and  $\mathbf{g}^*$  is a minimizer, gives  
 868 the simplification

$$\begin{aligned} \mathbb{E} [\|\mathbf{g}_{n+1} - \mathbf{g}^*\|_v^6 \mid \mathcal{F}_n] &\leq \|\mathbf{g}_n - \mathbf{g}^*\|_v^6 \\ &\quad - 6\|\mathbf{g}_n - \mathbf{g}^*\|_v^4 \gamma_{n+1} \langle \nabla H(\mathbf{g}_n), \mathbf{g}_n - \mathbf{g}^* \rangle_v \\ &\quad + 12\|\mathbf{g}_n - \mathbf{g}^*\|_v^4 \gamma_{n+1}^2 \\ &\quad + 12\|\mathbf{g}_n - \mathbf{g}^*\|_v^2 \gamma_{n+1}^2 \mathbb{E} [\langle \nabla h(\mathbf{g}_n, X_{n+1}), \mathbf{g}_n - \mathbf{g}^* \rangle_v^2 \mid \mathcal{F}_n] \\ &\quad + 48\|\mathbf{g}_n - \mathbf{g}^*\|_v^2 \gamma_{n+1}^4 \\ &\quad + 48\gamma_{n+1}^4 \mathbb{E} [\langle \nabla h(\mathbf{g}_n, X_{n+1}), \mathbf{g}_n - \mathbf{g}^* \rangle_v^2 \mid \mathcal{F}_n] \\ &\quad + 2^6 \gamma_{n+1}^6 \\ &\quad - 8\gamma_{n+1}^3 \mathbb{E} [\langle \nabla_{\mathbf{g}} h(\mathbf{g}_n, X_{n+1}), \mathbf{g}_n - \mathbf{g}^* \rangle_v^3 \mid \mathcal{F}_n]. \end{aligned}$$

869 Using Proposition B.16, we have for any  $\mathbf{g} \in \mathcal{C}$ ,  $\langle \nabla H(\mathbf{g}_n), \mathbf{g}_n - \mathbf{g}^* \rangle_v \geq \eta \|\mathbf{g}_n - \mathbf{g}^*\|_v^2$ . The  
 870 Cauchy-Schwarz inequality gives  $|\langle \nabla h(\mathbf{g}_n, X_{n+1}), \mathbf{g}_n - \mathbf{g}^* \rangle_v| \leq 2\|\mathbf{g}_n - \mathbf{g}^*\|_v$ . Combining these  
 871 two inequalities we obtain

$$\begin{aligned} \mathbb{E} [\|\mathbf{g}_{n+1} - \mathbf{g}^*\|_v^6 \mid \mathcal{F}_n] &\leq \|\mathbf{g}_n - \mathbf{g}^*\|_v^6 (1 - 6\eta\gamma_{n+1}) + 60\gamma_{n+1}^2 \|\mathbf{g}_n - \mathbf{g}^*\|_v^4 + 240\gamma_{n+1}^4 \|\mathbf{g}_n - \mathbf{g}^*\|_v^2 \\ &\quad + 2^6 \gamma_{n+1}^6 + 64\gamma_{n+1}^3 \|\mathbf{g}_n - \mathbf{g}^*\|_v^3. \end{aligned}$$

872 Using Young's (generalized) inequality  $ab = ac \frac{b}{c} \leq \frac{(ac)^p}{p} + \frac{b^q}{c^q q}$  for  $c \neq 0, \frac{1}{p} + \frac{1}{q} = 1$  and applying  
 873 it to  $60\gamma_{n+1} \|\mathbf{g}_n - \mathbf{g}^*\|_v^4$  with  $c = \left(\frac{2}{3\eta}\right)^{2/3}, p = 3, q = \frac{3}{2}$  gives  $60\gamma_{n+1} \|\mathbf{g}_n - \mathbf{g}^*\|_v^4 \leq \frac{60^3 \gamma_{n+1}^3}{3}$ .

874  $\left(\frac{2}{3\eta}\right)^2 + \eta\|\mathbf{g}_n - \mathbf{g}^*\|_v^6$ . Analogously, one has  $64\gamma_{n+1}^2\|\mathbf{g}_n - \mathbf{g}^*\|_v^3 \leq \frac{2^{10}}{\eta}\gamma_{n+1}^4 + \eta\|\mathbf{g}_n - \mathbf{g}^*\|_v^6$ .  
 875 Thus, taking the expectation, we have

$$\mathbb{E}[\|\mathbf{g}_{n+1} - \mathbf{g}^*\|_v^6] \leq \mathbb{E}[\|\mathbf{g}_n - \mathbf{g}^*\|_v^6](1 - 4\eta\gamma_{n+1}) + \gamma_{n+1}^4 \left( 240 \cdot \text{Diam}_2(\mathcal{C})^2 + \frac{32}{\eta^2} \cdot 10^3 \right) + \frac{2^{10}}{\eta}\gamma_{n+1}^5 + 64\gamma_{n+1}^6,$$

876 where the terms involving  $\text{Diam}_2(\mathcal{C})$  appears from the crude bound  $\|\mathbf{g}_n - \mathbf{g}\|_v \leq \text{Diam}_2(\mathcal{C})$ .

877 Applying Lemma F.3 in a similar way as in the proof of Theorem 4.4 gives  $\mathbb{E}[\|\mathbf{g}_{n+1} - \mathbf{g}^*\|_v^6] \lesssim \frac{\gamma_n^3}{\eta^3}$ ,  
 878 so by Jensen's inequality, we conclude

$$\mathbb{E}[\|\mathbf{g}_{n+1} - \mathbf{g}^*\|_v^{2p}] \lesssim \frac{\gamma_n^p}{\eta^p} \quad \text{for } p \in \{1, 2, 3\}.$$

879 □

## 880 C.2 Convergence of the averaged iterates.

881 **Theorem 4.4** (Averaged iterates) Under Assumptions (A1) or (B1–B3), and assuming that  $f_\mu$  is  
 882  $\alpha$ -Hölder with  $\alpha \in (0, 1]$ , for any decay schedule of the form  $\gamma_n = \gamma_1/n^b$  with  $\gamma_1 > 0$  and  
 883  $b \in \left(\frac{1}{1+\alpha}, 1\right)$ , we have the convergence rate

$$\mathbb{E}[\|\bar{\mathbf{g}}_n - \mathbf{g}^*\|_v^2] = \mathcal{O}(1/n).$$

884 Without assuming  $f_\mu$  to be  $\alpha$ -Hölder, and for  $b \in (1/2, 1)$ , we still obtain

$$\mathbb{E}[\|\bar{\mathbf{g}}_n - \mathbf{g}^*\|_v^2] = \mathcal{O}(1/n^b).$$

885 *Proof.* For this proof, we introduce the additional following notation:

886 For any  $c > 0$  we define the function  $t \mapsto \Psi_c(t)$  such that

$$\sum_{t=1}^T t^{-c} \leq \Psi_c(T) := \begin{cases} 1 + \ln(T+1) & \text{if } c = 1, \\ \frac{2c-1}{c-1} & \text{if } c > 1, \\ 1 + \frac{1}{1-c}(T+1)^{1-c} & \text{if } c < 1. \end{cases} \quad (15)$$

887 We start by a decomposition of the gradient step, already present in [18]. We define the differences

$$\begin{aligned} p_k &:= \text{Proj}_{\mathcal{C}}(\mathbf{g}_k - \gamma_{k+1}\nabla_{\mathbf{g}}h(\mathbf{g}_k, X_{k+1})) - (\mathbf{g}_k - \gamma_{k+1}\nabla_{\mathbf{g}}h(\mathbf{g}_k, X_{k+1})), \\ \xi_{k+1} &:= \nabla H(\mathbf{g}_k) - \nabla_{\mathbf{g}}h(\mathbf{g}_k, X_{k+1}), \\ \delta_k &:= \nabla H(\mathbf{g}_k) - \nabla^2 H(\mathbf{g}^*)(\mathbf{g}_k - \mathbf{g}^*). \end{aligned}$$

888 Noting  $I_M$  the identity matrix in  $\mathcal{M}_M(\mathbb{R})$ , we observe that, by incorporating each introduced term  
 889 sequentially, for any  $k \in \mathbb{N}$ , we have

$$\begin{aligned} \mathbf{g}_{k+1} - \mathbf{g}^* &= \text{Proj}_{\mathcal{C}}(\mathbf{g}_k - \gamma_{k+1}\nabla_{\mathbf{g}}h(\mathbf{g}_k, X_{k+1})) - \mathbf{g}^* \\ &= \mathbf{g}_k - \gamma_{k+1}\nabla_{\mathbf{g}}h(\mathbf{g}_k, X_{k+1}) - \mathbf{g}^* - p_k \\ &= \mathbf{g}_k - \gamma_{k+1}\nabla H(\mathbf{g}_k, X_{k+1}) - \mathbf{g}^* + \gamma_{k+1}\xi_{k+1} - p_k \\ &= (I_M - \gamma_{k+1}\nabla^2 H(\mathbf{g}^*))(\mathbf{g}_k - \mathbf{g}^*) - \gamma_{k+1}\delta_k + \gamma_{k+1}\xi_{k+1} + p_k. \end{aligned}$$

890 Thus, we have that

$$\nabla^2 H(\mathbf{g}^*)(\mathbf{g}_k - \mathbf{g}^*) = \frac{\mathbf{g}_k - \mathbf{g}_{k+1}}{\gamma_{k+1}} - \delta_k + \xi_{k+1} + \frac{p_k}{\gamma_{k+1}}.$$

891 Observing that  $\frac{1}{n+1} \sum_{k=0}^n (\mathbf{g}_k - \mathbf{g}^*) = \bar{\mathbf{g}}_n - \mathbf{g}^*$ , we have the following decomposition of the  
 892 averaged iterates

$$\nabla^2 H(\mathbf{g}^*)(\bar{\mathbf{g}}_n - \mathbf{g}^*) = \frac{1}{n+1} \sum_{k=0}^n \frac{\mathbf{g}_k - \mathbf{g}_{k+1}}{\gamma_{k+1}} - \frac{1}{n+1} \sum_{k=0}^n \delta_k + \frac{1}{n+1} \sum_{k=0}^n \xi_{k+1} + \frac{1}{n+1} \sum_{k=0}^n \frac{p_k}{\gamma_{k+1}}.$$

893 We will now give the convergence rate of each sum.

894 • **Convergence rate for**  $\frac{1}{n+1} \sum_{k=0}^n \frac{\mathbf{g}_k - \mathbf{g}_{k+1}}{\gamma_{k+1}}$ .

$$\begin{aligned} \sum_{k=0}^n \frac{\mathbf{g}_k - \mathbf{g}_{k+1}}{\gamma_{k+1}} &= \sum_{k=0}^n \frac{(\mathbf{g}_k - \mathbf{g}^*) - (\mathbf{g}_{k+1} - \mathbf{g}^*)}{\gamma_{k+1}} \\ &= \sum_{k=0}^n \frac{\mathbf{g}_k - \mathbf{g}^*}{\gamma_{k+1}} - \sum_{k=0}^n \frac{\mathbf{g}_{k+1} - \mathbf{g}^*}{\gamma_{k+1}} \\ &= \sum_{k=1}^n \left( \frac{1}{\gamma_{k+1}} - \frac{1}{\gamma_k} \right) (\mathbf{g}_k - \mathbf{g}^*) + \frac{\mathbf{g}_0 - \mathbf{g}^*}{\gamma_1} - \frac{\mathbf{g}_{n+1} - \mathbf{g}^*}{\gamma_{n+1}}. \end{aligned}$$

895 Remark that  $\gamma_{n+1}^{-1} - \gamma_n^{-1} \leq 2\gamma_1^{-1}n^{b-1}$ . Using Minkowski's inequality and that, by Theorem 4.4  
896 (non-averaged iterates),  $\mathbb{E} [\|\mathbf{g}_n - \mathbf{g}^*\|_v^2] \lesssim \frac{\gamma_1}{\eta} (n+1)^{-b}$ ,

$$\mathbb{E} \left[ \left\| \sum_{k=0}^n \frac{\mathbf{g}_k - \mathbf{g}_{k+1}}{\gamma_{k+1}} \right\|_v^2 \right]^{\frac{1}{2}} \lesssim \frac{1}{\eta} \Psi_{1-b/2}(n+1) + \text{Diam}_2(\mathcal{C})\gamma_1^{-1} + \frac{1}{\sqrt{\gamma_1\eta}}(n+1)^{b/2}.$$

897 We thus have the convergence rate

$$\frac{1}{n+1} \mathbb{E} \left[ \left\| \sum_{k=0}^n \frac{\mathbf{g}_k - \mathbf{g}_{k+1}}{\gamma_{k+1}} \right\|_v^2 \right]^{\frac{1}{2}} \lesssim \frac{1}{\eta(n+1)^{1-b/2}}.$$

898 • **Convergence rate for**  $\frac{1}{n+1} \sum_{k=0}^n \delta_k$ .

899 We recall that  $\delta_k = \nabla H(\mathbf{g}_k) - \nabla^2 H(\mathbf{g}^*)(\mathbf{g}_k - \mathbf{g}^*)$  and that the Hessian using either Theorem B.3  
900 or Proposition 4.1, depending on our setting, there exists a ball  $B(\mathbf{g}^*, d_1)$  with  $d_1 > 0$  where  $H$  is  
901  $\alpha$ -Hölder. Therefore, applying Lemma F.4, if  $\mathbf{g}_k \in B(\mathbf{g}^*, d_1)$ , we have

$$\|\delta_k\| \lesssim \|\mathbf{g}_k - \mathbf{g}^*\|_v^{1+\alpha}.$$

902 Otherwise, since the Hessian, whose expression is provided in Proposition B.5, is uniformly bounded  
903 by an application of Lemma F.2, there exists a constant  $C_\delta$  such that for any  $\mathbf{g} \in \mathcal{C}$ ,  $\|\nabla H(\mathbf{g}) -$   
904  $\nabla^2 H(\mathbf{g}^*)(\mathbf{g} - \mathbf{g}^*)\| \leq C_\delta$ .

905 Since  $\mathbb{P}(\mathbf{g}_k \notin B(\mathbf{g}^*, d_1)) = \mathbb{P}(\|\mathbf{g}_k - \mathbf{g}^*\| > d_1)$ , using Markov's inequality gives

$$\begin{aligned} \mathbb{E}[\|\delta_k\|_v^2] &= \mathbb{E}[\|\delta_k\|_v^2 \mathbf{1}_{\mathbf{g}_k \in B(\mathbf{g}^*, d_1)}] + \mathbb{E}[\|\delta_k\|_v^2 \mathbf{1}_{\mathbf{g}_k \notin B(\mathbf{g}^*, d_1)}] \\ &\lesssim \mathbb{E}[\|\mathbf{g}_k - \mathbf{g}^*\|_v^{2+2\alpha}] + \frac{C_\delta^2}{d_1^{2+2\alpha}} \mathbb{E}[\|\mathbf{g}_k - \mathbf{g}^*\|_v^{2+2\alpha}] \\ &\lesssim \mathbb{E}[\|\mathbf{g}_k - \mathbf{g}^*\|_v^{2+2\alpha}]. \end{aligned}$$

906 Therefore, using Minkowski's inequality, we have

$$\begin{aligned} \frac{1}{n+1} \mathbb{E} \left[ \left\| \sum_{k=0}^n \delta_k \right\|_v^2 \right]^{\frac{1}{2}} &\lesssim \frac{1}{n+1} \sum_{k=0}^n \frac{1}{\eta^{\frac{1+\alpha}{2}} \gamma_{k+1}^{\frac{1+\alpha}{2}}} \\ &\leq \frac{1}{\eta^{\frac{1+\alpha}{2}} (n+1)} \Psi_{\frac{b+\alpha b}{2}} \\ &\lesssim \frac{1}{\eta^{\frac{1+\alpha}{2}} (n+1)^{\frac{b+\alpha b}{2}}}. \end{aligned}$$

907 • **Convergence rate for**  $\frac{1}{n+1} \sum_{k=0}^n \xi_{k+1}$ .

908 We recall that  $\xi_{k+1} = \nabla H(\mathbf{g}_k) - \nabla_{\mathbf{g}} h(\mathbf{g}_k, X_{k+1})$  and thus  $\mathbb{E}[\xi_{k+1}] = 0$ .

909 Observe that

$$\mathbb{E} \left[ \left\| \sum_{k=0}^n \xi_{k+1} \right\|_v^2 \right] = \mathbb{E} \left[ \left\| \sum_{k=0}^{n-1} \xi_{k+1} \right\|_v^2 + 2 \left\langle \sum_{k=0}^{n-1} \xi_{k+1}, \xi_{n+1} \right\rangle_v + \|\xi_{n+1}\|_v^2 \right]$$

910 with

$$\mathbb{E} \left[ \left\langle \sum_{k=0}^{n-1} \xi_{k+1}, \xi_{n+1} \right\rangle_v \right] = \mathbb{E} \left[ \left\langle \sum_{k=0}^{n-1} \xi_{k+1}, \mathbb{E}[\xi_{n+1} | \mathcal{F}_n] \right\rangle_v \right] = 0.$$

911 Thus, since for all  $k$ ,  $\mathbb{E}[\|\xi_k\|^2] \leq 4$ , we have the convergence rate

$$\frac{1}{n+1} \mathbb{E} \left[ \left\| \sum_{k=0}^n \xi_{k+1} \right\|_v^2 \right]^{\frac{1}{2}} \leq \frac{2}{\sqrt{n+1}}.$$

912 • **Convergence rate for**  $\frac{1}{n+1} \sum_{k=0}^n \frac{p_k}{\gamma_{k+1}}$ .

913 Take  $d_0$  such that  $B(\mathbf{g}^*, d_0) \subset \mathcal{C}$ . Using the notation  $\nabla_k := \nabla_{\mathbf{g}} h(\mathbf{g}_k, X_{k+1})$  for conciseness, we  
914 obtain

$$\begin{aligned} \mathbb{E}[\|p_k\|_v^2] &= \mathbb{E}[\|\text{Proj}_{\mathcal{C}}(\mathbf{g}_k - \gamma_{k+1} \nabla_k) - (\mathbf{g}_k - \gamma_{k+1} \nabla_k)\|_v^2] \\ &= \mathbb{E}[\|\text{Proj}_{\mathcal{C}}(\mathbf{g}_k - \gamma_{k+1} \nabla_k) - (\mathbf{g}_k - \gamma_{k+1} \nabla_k)\|_v^2 \mathbf{1}_{\mathbf{g}_k - \gamma_{k+1} \nabla_k \notin \mathcal{C}}] \end{aligned}$$

915 Since for any  $y \in \mathcal{C}$ , one has  $\|x - \text{Proj}_{\mathcal{C}}(x)\|_v \leq \|x - y\|_v$ , taking  $y = \mathbf{g}_k$ , and since  $\mathbf{g}_k - \gamma_{k+1} \nabla_k \notin \mathcal{C}$   
916 is satisfied only if  $\|\mathbf{g}_k - \gamma_{k+1} \nabla_k - \mathbf{g}^*\|_v > d_0$ , we have

$$\begin{aligned} \mathbb{E}[\|p_k\|_v^2] &\leq \mathbb{E}[\|\gamma_{k+1} \nabla_k\|_v^2 \mathbf{1}_{\|\mathbf{g}_k - \gamma_{k+1} \nabla_k - \mathbf{g}^*\|_v > d_0}] \\ &\leq 4\gamma_{k+1}^2 \frac{\mathbb{E}[\|\mathbf{g}_k - \gamma_{k+1} \nabla_k - \mathbf{g}^*\|_v^4]}{d_0^4} \\ &\leq \frac{\gamma_{k+1}^2}{d_0^4} \left( 2^5 \mathbb{E}[\|\mathbf{g}_k - \mathbf{g}^*\|_v^4] + 2^9 \gamma_{k+1}^4 \right) \\ &\lesssim \frac{1}{\eta^2} \gamma_{k+1}^4 \end{aligned}$$

917 Where we used Markov's inequality and the inequality  $(A + B)^4 \leq 2^3(A^4 + B^4)$ , for all  $A, B \in \mathbb{R}$

918 and that by Proposition C.1,  $\mathbb{E}[\|\mathbf{g}_n - \mathbf{g}^*\|^4] \lesssim \frac{\gamma_1^2}{\eta^2} (n+1)^{-2b}$ .

919 We thus have

$$\begin{aligned} \frac{1}{n+1} \mathbb{E} \left[ \left\| \sum_{k=0}^n \frac{p_k}{\gamma_{k+1}} \right\|_v^2 \right]^{\frac{1}{2}} &\lesssim \frac{1}{n+1} \sum_{k=0}^n \frac{\gamma_{k+1}}{\eta} \\ &\lesssim \frac{\gamma_1}{\eta(n+1)^b}. \end{aligned}$$

920 • **Conclusion.**

921 Using the convergence rate of all our terms, Cauchy-Schwarz inequality and that  $(A + B)^2 \leq$   
922  $2(A^2 + B^2)$  for all  $A, B \in \mathbb{R}$  we conclude

$$\begin{aligned} \mathbb{E}[\|\nabla^2 H(\mathbf{g}^*)(\bar{\mathbf{g}}_n - \mathbf{g}^*)\|_v^2] &= \mathbb{E} \left[ \left\| \frac{1}{n+1} \sum_{k=0}^n \frac{\mathbf{g}_k - \mathbf{g}_{k+1}}{\gamma_{k+1}} - \frac{1}{n+1} \sum_{k=0}^n \delta_k + \frac{1}{n+1} \sum_{k=0}^n \xi_{k+1} + \frac{1}{n+1} \sum_{k=0}^n \frac{p_k}{\gamma_{k+1}} \right\|_v^2 \right] \\ &\lesssim \frac{1}{\eta^2(n+1)^{2-b}} + \frac{1}{\eta^{\frac{1+\alpha}{\alpha}}(n+1)^{b+\alpha b}} + \frac{1}{n+1} + \frac{\gamma_1^4}{\eta^2(n+1)^{2b}}. \end{aligned}$$



923 Since  $b \in (\frac{1}{2}, 1)$  and  $b \in (\frac{1}{1+\alpha}, 1)$  the limiting term is  $\frac{1}{n+1}$  and we have

$$\mathbb{E} \left[ \left\| \nabla^2 H(\mathbf{g}^*) (\bar{\mathbf{g}}_n - \mathbf{g}^*) \right\|_v^2 \right] \lesssim \frac{1}{n+1}.$$

924 Finally, observe that there is an orthogonal matrix  $U$  such that  $\nabla^2 H(\mathbf{g}^*) =$   
 925  $U \text{diag}(\lambda_1, \dots, \lambda_{M-1}, 0) U^\top$ . Therefore, noting by abuse of notation

$$(\nabla^2 H(\mathbf{g}^*))^{-1} = U \text{diag}(\lambda_1^{-1}, \dots, \lambda_{M-1}^{-1}, 0) U^\top$$

926 the inverse of  $\nabla_k^2$  in the space  $\text{Vect}(\mathbf{1}_M)^\perp$  we finally have

$$\mathbb{E}[\|\bar{\mathbf{g}}_n - \mathbf{g}^*\|_v^2] \lesssim \frac{1}{\lambda^2(n+1)}$$

927 where  $\lambda = \min_{j \in \llbracket 1, M-1 \rrbracket} \lambda_j > 0$  by either Theorem B.3 or Proposition B.12.  $\square$

### 928 C.3 Convergence rate of PSGD in the general setting

929 **Theorem 3.2** (PSGD in the general setting) Assuming that the semi-dual problem (4) admits at least  
 930 one solution  $\mathbf{g}^*$  and that there exists a compact set  $K$  such that  $\mu(K) \geq 1 - \frac{1}{2}w_{\min}$ , choosing the  
 931 learning rate  $\gamma_n = \gamma_1/n^b$  with  $\gamma_1 = \frac{\text{Diam}(\mathcal{C})}{2\sqrt{2}}$  and  $b = \frac{1}{2}$ , we obtain

$$\mathbb{E}[H(\bar{\mathbf{g}}_n) - H(\mathbf{g}^*)] \leq \frac{4\sqrt{2} \text{Diam}(\mathcal{C})}{\sqrt{n}}.$$

932 *Proof.* Define  $\gamma_k = \frac{\gamma_1}{\sqrt{k}}$  for  $\gamma_1 > 0, k \geq 1$  and denote by  $\mathbf{g}^* \in \mathcal{C}$  a minimizer of the functional  $H$ .  
 933 Thanks to Jensen's inequality coupled with the fact that no matter  $\mathbf{g} \in \mathbb{R}^M : H(\mathbf{g}) - H(\mathbf{g}^*) \leq$   
 934  $\nabla H(\mathbf{g})^\top (\mathbf{g} - \mathbf{g}^*)$ , it comes

$$\mathbb{E}[H(\bar{\mathbf{g}}_n) - H(\mathbf{g}^*)] \leq \mathbb{E} \left[ \frac{1}{n+1} \sum_{k=0}^n H(\mathbf{g}_k) - H(\mathbf{g}^*) \right] \leq \frac{1}{n+1} \mathbb{E} \left[ \sum_{k=0}^n \nabla H(\mathbf{g}_k)^\top (\mathbf{g}_k - \mathbf{g}^*) \right].$$

935 Then, since no matter  $k$ ,  $X_{k+1} \sim \mu$ , we have  $\mathbb{E}[\nabla_{\mathbf{g}} h(\mathbf{g}_k, X_{k+1}) \mid \mathcal{F}_k] = \nabla H(\mathbf{g}_k)$ , we have

$$\mathbb{E}[H(\bar{\mathbf{g}}_n) - H(\mathbf{g}^*)] \leq \frac{1}{n+1} \mathbb{E} \left[ \sum_{k=0}^n \nabla_{\mathbf{g}} h(\mathbf{g}_k, X_{k+1})^\top (\mathbf{g}_k - \mathbf{g}^*) \right]. \quad (16)$$

936 We will proceed to bound the right hand side of this inequality.

937 By definition of  $\mathbf{g}_{k+1}$ , and since  $\mathbf{g}^* \in \mathcal{C}$  and  $\text{Proj}_{\mathcal{C}}$  is 1-Lipschitz, it comes

$$\begin{aligned} \mathbb{E}[\|\mathbf{g}_{k+1} - \mathbf{g}^*\|^2] &\leq \mathbb{E}[\|\text{Proj}_{\mathcal{C}}(\mathbf{g}_k - \gamma_{k+1} \nabla_{\mathbf{g}} h(\mathbf{g}_k, X_{k+1})) - \mathbf{g}^*\|^2] \\ &\leq \mathbb{E}[\|\mathbf{g}_k - \gamma_{k+1} \nabla_{\mathbf{g}} h(\mathbf{g}_k, X_{k+1}) - \mathbf{g}^*\|^2] \\ &\leq \mathbb{E}[\|\mathbf{g}_k - \mathbf{g}^*\|^2 + \gamma_{k+1}^2 \|\nabla_{\mathbf{g}} h(\mathbf{g}_k, X_{k+1})\|^2 - 2\gamma_{k+1} \nabla_{\mathbf{g}} h(\mathbf{g}_k, X_{k+1})^\top (\mathbf{g}_k - \mathbf{g}^*)]. \end{aligned}$$

938 In addition, since  $\|\nabla_{\mathbf{g}} h(\mathbf{g}, X)\| \leq 2$  a.s. no matter  $\mathbf{g} \in \mathbb{R}^M$  and  $X \in \mathbb{R}^d$ ,

$$\mathbb{E}[2\gamma_{k+1} \nabla_{\mathbf{g}} h(\mathbf{g}_k, X_{k+1})^\top (\mathbf{g}_k - \mathbf{g}^*)] \leq \mathbb{E}[\|\mathbf{g}_k - \mathbf{g}^*\|^2 - \|\mathbf{g}_{k+1} - \mathbf{g}^*\|^2 + 4\gamma_{k+1}^2].$$

939 Then, with the help of Abel's summation formula,

$$\begin{aligned} 2\mathbb{E} \left[ \sum_{k=0}^n \nabla_{\mathbf{g}} h(\mathbf{g}_k, X_{k+1})^\top (\mathbf{g}_k - \mathbf{g}^*) \right] &\leq \mathbb{E} \left[ \sum_{k=0}^n \frac{\|\mathbf{g}_k - \mathbf{g}^*\|^2 - \|\mathbf{g}_{k+1} - \mathbf{g}^*\|^2}{\gamma_{k+1}} \right] + 4 \sum_{k=0}^n \gamma_{k+1} \\ &\leq \mathbb{E} \left[ \sum_{k=1}^n \|\mathbf{g}_k - \mathbf{g}^*\|^2 \left( \frac{1}{\gamma_{k+1}} - \frac{1}{\gamma_k} \right) \right] - \frac{\|\mathbf{g}_{k+1} - \mathbf{g}^*\|^2}{\gamma_{k+1}} + \frac{\|\mathbf{g}_0 - \mathbf{g}^*\|^2}{\gamma_1} + 4 \sum_{k=0}^n \gamma_{k+1} \end{aligned}$$

940 Then, since for all  $k$ ,  $\|\mathbf{g}_k - \mathbf{g}^*\| \leq \text{Diam}_2(\mathcal{C})$ , it comes

$$\begin{aligned} 2\mathbb{E} \left[ \sum_{k=0}^n \nabla_{\mathbf{g}} h(\mathbf{g}_k, X_{k+1})^\top (\mathbf{g}_k - \mathbf{g}^*) \right] &\leq \text{Diam}_2(\mathcal{C})^2 \sum_{k=1}^n \left( \frac{1}{\gamma_{k+1}} - \frac{1}{\gamma_k} \right) + \frac{D^2}{\gamma_1} + 4 \sum_{k=1}^n \gamma_k \\ &\leq \frac{\text{Diam}_2(\mathcal{C})^2}{\gamma_{n+1}} + 4 \sum_{k=1}^n \gamma_k \\ &\leq \frac{\text{Diam}_2(\mathcal{C})^2}{\gamma_1} \sqrt{n+1} + 8\gamma_1 \sqrt{n+1} \end{aligned}$$

941 Using the inequality (16) we obtain

$$\mathbb{E} [H(\bar{g}_n) - H(\mathbf{g}^*)] \leq \frac{1}{\sqrt{n+1}} \left( \frac{\text{Diam}_2(\mathcal{C})^2}{\gamma_1} + 8\gamma_1 \right).$$

942 The best constant  $\gamma_1$  is then  $\gamma_1 = \frac{\text{Diam}_2(\mathcal{C})}{2\sqrt{2}}$ , but no matter  $\gamma_1 > 0$ , we have the desired convergence  
943 rate

$$\mathbb{E} [H(\bar{g}_n) - H(\mathbf{g}^*)] = \mathcal{O}(1/\sqrt{n}).$$

944

□

## 945 D Proof of Lemma 3.1: Localisation of a projection set

946 **Lemma 3.1** (Existence of a projection set) As soon as the semi-dual problem is well-posed, there  
947 exists a minimizer  $\mathbf{g}^*$  in the set

$$\mathcal{C} := \{\mathbf{g} \in \{0\} \times \mathbb{R}^{M-1} \mid |g_j| \leq \|c\|_{K,\infty}\}$$

948 where  $\|c\|_{K,\infty} := \sup_{x \in K, j \in \llbracket 1, M \rrbracket} |c(x, y_j)|$  for any compact set  $K$  satisfying  $\mu(K) \geq 1 - \frac{1}{2} \min w_j$ .

949 *Proof.* By the first order condition, the minimizer of  $H$  satisfies  $\mu(\mathbb{L}_j(\mathbf{g})) = w_j$  for all  $j \in \llbracket 1, M \rrbracket$ .  
950 In particular, one can restrict the search set for an optimal potential to the set of potentials defined by

$$\mathcal{L} := \left\{ \mathbf{g} \in \mathbb{R}^M : \forall j \in \llbracket 1, M \rrbracket, \mu(\mathbb{L}_j(\mathbf{g})) \geq \frac{2}{3} w_{\min} \right\}.$$

951 Let us show that this set is contained in an  $L^\infty$  ball with an explicit radius. Consider any compact set  
952  $K$  such that  $\mu(K) \geq 1 - \frac{1}{2} w_{\min}$ . For  $\mathbf{g} \in \mathcal{L}$  and any  $j \in \llbracket 1, M \rrbracket$  we get that

$$\begin{aligned} \mu(\mathbb{L}_j(\mathbf{g}) \cap K) &= 1 - \mu((\mathbb{R}^M \setminus \mathbb{L}_j(\mathbf{g})) \cup (\mathbb{R}^M \setminus K)) \\ &\geq 1 - \mu((\mathbb{R}^M \setminus \mathbb{L}_j(\mathbf{g}))) - \mu((\mathbb{R}^M \setminus K)) \\ &= 1 - (1 - \mu(\mathbb{L}_j(\mathbf{g}))) - (1 - \mu(K)) \\ &\geq \frac{w_{\min}}{6} > 0, \end{aligned}$$

953 and so  $\mathbb{L}_j(\mathbf{g}) \cap K \neq \emptyset$ . In particular, for every  $j \in \llbracket 1, M \rrbracket$ , there exists  $x_j \in \mathbb{L}_j(\mathbf{g}) \cap K$  and so for  
954 all  $i \in \llbracket 1, M \rrbracket$

$$c(x_j, y_j) - g_j \leq c(x_j, y_i) - g_i.$$

955 Therefore, using the fact that the cost is non-negative, we have

$$\begin{aligned} \max_i g_i - \min_j g_j &\leq \max_i \max_j \{c(x_j, y_i) - c(x_j, y_j)\} \\ &\leq \max_{i,j \in \llbracket 1, M \rrbracket} \sup_{x \in K} c(x, y_i) = \|c\|_{K,\infty}. \end{aligned}$$

956 Moreover, since  $H(\mathbf{g} + \lambda \mathbb{1}_M) = H(\mathbf{g})$  one can fix  $g_1 = 0$ , which concludes the proof. □

## E Minimax estimation of OT quantities

Consider  $P, Q \in \mathcal{P}(\mathbb{R}^d)$  with densities  $f_P$  and  $f_Q$ . We recall that the Hellinger distance is defined by

$$d_H(P, Q) := \left( \int_{\mathbb{R}^d} \left( \sqrt{f_P(x)} - \sqrt{f_Q(x)} \right)^2 d\lambda_{\mathbb{R}^d}(x) \right)^{\frac{1}{2}}. \quad (17)$$

We also recall the formulation of Le Cam's Lemma. We refer to [32], Chapter 15, for more details.

**Lemma E.1.** (*Le Cam's Lemma.*) Let  $\mathcal{P}$  be a set of probability distributions on a measurable space, and consider the problem of estimating a parameter  $\theta \in \Theta$  with a loss function  $\ell$  defined, for all  $\hat{\theta}, \theta \in \Theta$ , as

$$\ell(\hat{\theta}, \theta) = d(\hat{\theta}, \theta)^p,$$

where  $p \geq 1$  is an integer, and  $d$  is a distance on  $\Theta$ . Then, for all  $\theta_1, \theta_2 \in \Theta$ ,

$$R_M = \inf_{T^{(n)}} \sup_{\theta \in \Theta} \mathbb{E}_{\theta}[\ell(\theta, T^{(n)}(X))] \geq \frac{1}{2^p} (1 - \sqrt{nd_H(P_{\theta_1}, P_{\theta_2})}) d(\theta_1, \theta_2)^p,$$

where  $R_M$  is the minimax risk, and  $T^{(n)}$  is an estimator based on  $n$  i.i.d samples from  $P_{\theta}$ .

In the sequel, we note  $\mathcal{P}_H$  the set of absolute continuous measures that verify Assumption A.

### E.1 Kantorovich potential

*Proof.* Consider  $\nu = \frac{1}{2}\delta_{\{0\}} + \frac{1}{2}\delta_{\{1\}}$  and fix the cost to transfer mass to be the usual quadratic cost  $c(x, y) = \frac{1}{2}\|x - y\|^2$ .

For  $\delta \geq 0$ , we define  $\mu_{\theta\delta} = \mathcal{N}(\delta, 1)$ . Since  $d = 1$ , the optimal transport map is monotone non-decreasing (see, for instance, Chapter 2 in [30]). Thus, we must have the identity

$$T_{\mu_{\theta\delta}, \nu}(x) = \begin{cases} 0, & \text{if } x \leq \delta, \\ 1, & \text{otherwise.} \end{cases}$$

Therefore the vector  $\theta^\delta \in \mathbb{R}^2$  solves the semi-dual problem if and only if it satisfies the following inequalities

$$\begin{aligned} c(x, 0) - \theta_1^\delta &\leq c(x, 1) - \theta_2^\delta, & \forall x \leq \delta, \\ c(x, 1) - \theta_2^\delta &\leq c(x, 0) - \theta_1^\delta, & \forall x > \delta. \end{aligned}$$

Since  $c(x, y) = \frac{1}{2}\|x - y\|^2$  we can fix  $\theta_1^\delta = 0$  and compute

$$\theta^\delta = \left( 0, \frac{1}{2} - \delta \right).$$

Therefore, we parameterized the family of probability measures  $\mu_\theta \in \mathcal{P}_H$  so that the couple  $(\theta^c, \theta)$  is the unique solution in  $\Theta \subset \{\theta = (\theta_1, \theta_2) \in \mathbb{R}^2; \theta_1 = 0\}$  of the dual of  $\text{OT}(\mu_\theta, \nu)$ . In this class of probabilities, the minimax estimation of the optimal transport potential  $\theta$ , given  $n > 0$  i.i.d samples of the source measure, can be written as

$$R_n^\Theta := \inf_{\hat{\theta}^{(n)}} \sup_{\theta \in \Theta} \mathbb{E}_{\mu_\theta} [\|\hat{\theta}^{(n)} - \theta\|^2],$$

where  $\hat{\theta}^{(n)}$  is based on the  $n$  i.i.d samples from the source measure  $\mu$ . Note that

$$R_n^\Theta \leq \inf_{\mathbf{g}^{(n)}} \sup_{\mu \in \mathcal{P}_H} \mathbb{E}_\mu [\|\mathbf{g}^{(n)} - \mathbf{g}^*\|^2], \quad (18)$$

where the infimum is taken over all vectors  $\mathbf{g}^{(n)}$  based on  $n$  i.i.d samples of  $\mu$ .

Using the closed form of the Hellinger distance between Gaussian distributions, we have

$$d_H(\mu_{\theta^0}, \mu_{\theta^\delta}) = \sqrt{1 - \exp\left(-\frac{\delta^2}{8}\right)}.$$

980 For  $\delta \rightarrow 0$ , the Taylor expansion gives  $d_H(\mu_{\theta^0}, \mu_{\theta^\delta}) = \delta/\sqrt{8} + o(\delta)$ . Applying Le Cam's Lemma  
981 with  $\delta = 1/\sqrt{n}$  gives

$$\begin{aligned} R_n^\Theta &\geq \frac{1}{4} (1 - \sqrt{n} d_H(\mu_{\theta^0}, \mu_{\theta^\delta})) \|\theta^0 - \theta^\delta\|_2^2 \\ &\geq \frac{1}{4} \left(1 - 1/\sqrt{8} + o(1)\right) \frac{1}{n} \\ &\geq \frac{1}{10n} + o\left(\frac{1}{n}\right) \end{aligned}$$

982 Using the inequality (18) concludes the proof.  $\square$

## 983 E.2 OT map

984 *Proof.* Define for  $\delta \in [0, 1]$  the set of probability measures  $\mu_\delta$ , with density:

$$f_{\mu_\delta}(x) = \mathbf{1}_{x \in [0,1]} (1 + \delta g(x)), \quad x \in [0, 1],$$

985 where

$$g(x) = \begin{cases} 2(1 - 2x), & x \in [0, 1/2], \\ -2(2x - 1), & x \in [1/2, 1]. \end{cases}$$

986 The squared Hellinger distance between  $\mu_0$  (uniform) and  $\mu_\delta$  is:

$$\begin{aligned} d_H(\mu_0, \mu_\delta)^2 &= \frac{1}{2} \int_0^1 (\sqrt{1} - \sqrt{1 + \delta g(x)})^2 dx \\ &= \frac{1}{6\delta} \left( (1 - 2\delta)^{3/2} + 6\delta - (1 + 2\delta)^{3/2} \right) \\ &= \frac{1}{2} \delta^2 + o(\delta^2) \end{aligned}$$

987 when  $\delta \rightarrow 0$ . Therefore, we obtain

$$d_H(\mu_0, \mu_\delta) = \frac{1}{\sqrt{2}} \delta + o(\delta).$$

988 Since  $\mu_\delta \in \mathcal{P}_H$ ,  $\delta \in [0, 1]$ , we have

$$\inf_{T^{(n)}} \sup_{\mu \in \mathcal{P}_H} \mathbb{E}_\mu \left[ \left\| T^{(n)} - T_{\mu, \nu} \right\|_{L^p(\mu)}^p \right] \geq \inf_{T^{(n)}} \sup_{\delta \in [0,1]} \mathbb{E}_{\mu_\delta} \left[ \left\| T^{(n)} - T_{\mu_\delta, \nu} \right\|_{L^p(\mu_\delta)}^p \right]. \quad (19)$$

989 From the relation  $1 - 2\delta \leq f_{\mu_\delta}(x) \leq 1 + 2\delta, \forall x \in [0, 1]$ , we infer that no matter  $T^{(n)}$  and  $\delta$  small  
990 enough

$$\left\| T^{(n)} - T_{\mu_\delta, \nu} \right\|_{L^p(\mu_\delta)}^p \geq \frac{1}{2} \left\| T^{(n)} - T_{\mu_\delta, \nu} \right\|_{L^p(\mathcal{U}(0,1))}^p. \quad (20)$$

991 Consider  $\nu = \frac{1}{2} \delta_{\{0\}} + \frac{1}{2} \delta_{\{1\}}$  as above. Recall that the optimal transport map is monotone non-  
992 decreasing in dimension 1. Moreover by definition  $T_{\mu_\delta, \nu}(x) \in \{0, 1\}, x \in [0, 1]$ , and  $\mu_\delta(T_{\mu_\delta, \nu}^{-1}(0)) =$   
993  $1/2$ . Therefore one identifies  $T_{\mu_\delta, \nu} = \mathbf{1}_{x \geq M_\delta}$  where  $M_\delta$  is the median of  $\mu_\delta, \delta > 0$ , satisfying

$$\int_0^{M_\delta} (1 + \delta g(x)) dx = \frac{1}{2}.$$

994 Noticing that  $M_\delta \in [0, 1/2]$ , we solve

$$\int_0^{M_\delta} (1 + 2\delta(1 - 2x)) dx = \frac{1}{2},$$

995 which gives the solution

$$M_\delta = \frac{1 + 2\delta - \sqrt{1 + 4\delta^2}}{4\delta} = \frac{1}{2} - \frac{1}{2}\delta + o(\delta).$$

996 Observe that

$$\|T_{\mu_0, \nu} - T_{\mu_\delta, \nu}\|_{L^p(\mathcal{U}(0,1))}^p = \int_0^1 |\mathbf{1}_{x \geq M_0} - \mathbf{1}_{x \geq M_\delta}|^p dx = |M_\delta - M_0|.$$

997 We proved the relation  $\|T_{\mu_0, \nu} - T_{\mu_\delta, \nu}\|_{L^p(\mathcal{U}(0,1))}^p = \delta + o(\delta)$ . Applying Le Cam's Lemma with

998  $\delta = \frac{1}{\sqrt{n}}$  for  $n$  sufficiently large and any  $p \in [1, \infty)$ , we obtain

$$\begin{aligned} \inf_{T^{(n)}} \sup_{\delta \in [0,1]} \mathbb{E}_{\mu_\delta} \left[ \|T^{(n)} - T_{\mu_\delta, \nu}\|_{L^p(\mathcal{U}(0,1))}^p \right] &\geq \frac{1}{2^p} (1 - \sqrt{n} d_H(\mu_0, \mu_\delta)) \|T_{\mu_0, \nu} - T_{\mu_\delta, \nu}\|_{L^p(\mathcal{U}(0,1))}^p \\ &\geq \frac{1}{2^p} \left( 1 - \frac{1}{\sqrt{2}} + o(1) \right) \left( \frac{1}{\sqrt{n}} + o\left(\frac{1}{\sqrt{n}}\right) \right) \\ &\gtrsim \frac{1}{\sqrt{n}}. \end{aligned}$$

999 Therefore, combining inequalities (19) and (20) we conclude

$$\inf_{T^{(n)}} \sup_{\mu \in \mathcal{P}_H} \mathbb{E}_\mu \left[ \|T^{(n)} - T_{\mu, \nu}\|_{L^p(\mu)}^p \right] \gtrsim \frac{1}{\sqrt{n}}.$$

1000

□

## 1001 F Technical Lemmas

### 1002 F.1 Technical Lemmas for Appendix B

1003 **Lemma F.1.** *Perturbation of Laplacian Matrices. Let  $A$  and  $B$  be symmetric Laplacian matrices of*  
 1004 *the same size such that:*

$$A_{ij} \leq 0, \quad B_{ij} \leq A_{ij} \quad \text{for all } i \neq j.$$

1005 Suppose  $\lambda_2(A) > 0$ , where  $\lambda_2(A)$  denotes the second smallest eigenvalue of  $A$ . Then:

$$\lambda_2(B) \geq \lambda_2(A)$$

1006 where  $\lambda_2(B)$  is the second smallest eigenvalue of  $B$ .

1007 *Proof.* We recall the variational characterization of the second smallest eigenvalue of a Laplacian  
 1008 matrix  $M$  is

$$\lambda_2(M) = \min_{x \perp \mathbf{1}} \frac{x^T M x}{x^T x}.$$

1009 Define the matrix  $C = B - A$ . For  $i \neq j$ :

$$C_{ij} = B_{ij} - A_{ij} \leq 0,$$

1010 and for diagonal elements

$$C_{ii} = B_{ii} - A_{ii} = - \sum_{j \neq i} C_{ij} \geq 0.$$

1011 Thus,  $C$  is a Laplacian matrix and so it is positive, semi-definite.

1012 Let  $y_2$  be the eigenvector corresponding to  $\lambda_2(B)$ , the second smallest eigenvalue of  $B$ , that is

$$By_2 = \lambda_2(B)y_2 \quad \text{with } y_2 \perp \mathbf{1}.$$

1013 Since  $A = B - C$ , we have

$$y_2^T A y_2 = y_2^T (B - C) y_2 = y_2^T B y_2 - y_2^T C y_2.$$

1014 Thus,

$$\frac{y_2^T A y_2}{y_2^T y_2} = \lambda_2(B) - \frac{y_2^T C y_2}{y_2^T y_2}.$$

1015 By the variational principle:

$$\lambda_2(A) = \min_{x \perp \mathbf{1}} \frac{x^T A x}{x^T x} \leq \frac{y_2^T A y_2}{y_2^T y_2} \leq \lambda_2(B) - \frac{y_2^T C y_2}{y_2^T y_2}.$$

1016 Since  $C$  is a Laplacian matrix, we have  $y_2^T C y_2 \geq 0$ , no matter  $y_2$  and thus  $\lambda_2(A) \leq \lambda_2(B)$  which  
1017 completes the proof.

1018 □

1019 **Lemma F.2.** Let  $f_\mu$  satisfy, for all  $x \in \mathbb{R}^d$ , the decay condition

$$\sum_{r \geq 1} r^{d-1} \sup_{x \in \mathbb{R}^d \setminus B(0, r-1)} f_\mu(x) < \infty.$$

1020 Then, there exists a constant  $C > 0$  such that, for any hyperplane  $H \subset \mathbb{R}^d$ , we have

$$\int_H f_\mu(x) d\mathcal{H}^{d-1}(x) \leq C.$$

1021 *Proof.* Defining for any  $r \in \mathbb{N}^*$ ,  $R(r) := B(0, r) \setminus B(0, r-1)$ , we have

$$\begin{aligned} \int_H f_\mu(x) d\mathcal{H}^{d-1}(x) &= \sum_{r \geq 1} \int_{H \cap R(r)} f_\mu(x) d\mathcal{H}^{d-1}(x) \\ &\leq \sum_{r \geq 1} \int_{H \cap R(r)} \sup_{x \in R(r)} f_\mu(x) d\mathcal{H}^{d-1}(x) \\ &\leq \sum_{r \geq 1} \int_{H \cap R(r)} \sup_{x \in \mathbb{R}^d \setminus B(0, r-1)} f_\mu(x) d\mathcal{H}^{d-1}(x) \end{aligned}$$

1022 Then, using the fact that  $\mathcal{H}^{d-1}(H \cap R(r)) \leq \mathcal{H}^{d-1}(H \cap B(0, r))$ , and noting that  $H \cap B(0, r)$  is  
1023 a  $(d-1)$ -dimensional ball of radius  $r$ , we have

$$\mathcal{H}^{d-1}(H \cap R(r)) \leq \frac{\pi^{(d-1)/2}}{\Gamma\left(\frac{d+1}{2}\right)} r^{d-1}.$$

1024 Therefore, incorporating this bound, we obtain:

$$\int_H f_\mu(x) d\mathcal{H}^{d-1}(x) \leq \sum_{r \geq 1} \frac{\pi^{(d-1)/2}}{\Gamma\left(\frac{d+1}{2}\right)} r^{d-1} \sup_{x \in \mathbb{R}^d \setminus B(0, r)} f_\mu(x)$$

1025 which is finite by our decay assumption on  $f_\mu$ .

1026 □

## 1027 F.2 Technical Lemmas for Appendix C

1028 **Lemma F.3.** *Let  $(\gamma_n)_{n \geq 0}$  and  $(m_n)_{n \geq 0}$  be some positive and decreasing sequences and let  $(\delta_n)_{n \geq 0}$ ,*  
 1029 *satisfying the following:*

1030 • *The sequence  $\delta_n$  follows the recursive relation:*

$$\delta_{n+1} \leq (1 - \omega\gamma_{n+1})\delta_n + m_{n+1}\gamma_{n+1}, \quad (21)$$

1031 *with  $\delta_0 \geq 0$  and  $\omega > 0$ .*

1032 •  *$\gamma_n$  converges to 0.*

1033 • *Let  $n_0 = \inf \{n \geq 1 : \omega\gamma_{n+1} \leq 1\}$ ,  $\delta_{n_0}$  is non-negative.*

1034 *Then, for all  $n \geq n_0$ , we have the upper bound:*

$$\delta_n \leq \exp\left(-\omega \sum_{i=n_0+1}^n \gamma_i\right) \left(\sum_{k=n_0}^n \gamma_k m_k + \delta_{n_0}\right) + \frac{1}{\omega} m_{\lceil \frac{n}{2} \rceil - 1}$$

1035 *Proof.* For all  $n \geq n_0$ , one has

$$\delta_n \leq \underbrace{\prod_{i=n_0+1}^n (1 - \omega\gamma_i) \delta_{n_0}}_{=: \tilde{U}_{1,n}} + \underbrace{\sum_{k=n_0+1}^n \prod_{i=k+1}^n (1 - \omega\gamma_i) \gamma_k m_k}_{=: \tilde{U}_{2,n}}$$

1036 One can consider two cases:  $\lceil n/2 \rceil - 1 \leq n_0$  and  $\lceil n/2 \rceil - 1 > n_0$ .

1037 **Case where  $\lceil n/2 \rceil - 1 \leq n_0 < n$ :** Since  $m_k$  is decreasing,

$$\begin{aligned} U_{2,n} &\leq m_{n_0+1} \sum_{k=n_0+1}^n \prod_{i=k+1}^n (1 - \omega\gamma_i) \gamma_k \\ &= \frac{1}{\omega} m_{n_0+1} \sum_{k=n_0+1}^n \prod_{i=k+1}^n (1 - \omega\gamma_i) - \prod_{i=k}^n (1 - \omega\gamma_i) \\ &= \frac{1}{\omega} m_{n_0+1} \left(1 - \prod_{i=n_0+1}^n (1 - \omega\gamma_i)\right) \\ &\leq \frac{1}{\omega} m_{n_0+1} \end{aligned}$$

1038 Since  $m_k$  is decreasing, it comes  $U_{2,n} \leq \frac{1}{\omega} m_{\lceil n/2 \rceil}$ .

1039 **Case where  $\lceil n/2 \rceil - 1 > n_0$ :** As in [4], for all  $m = n_0 + 1, \dots, n$ , one has

$$U_{2,n} \leq \exp\left(-\omega \sum_{k=m+1}^n \gamma_k\right) \sum_{k=n_0+1}^m \gamma_k m_k + \frac{1}{\omega} m_m$$

1040 Then, taking  $m = \lceil n/2 \rceil - 1$ , it comes

$$U_{2,n} \leq \exp\left(-\omega \sum_{k=\lceil n/2 \rceil}^n \gamma_k\right) \sum_{k=n_0+1}^{\lceil n/2 \rceil - 1} \gamma_k m_k + \frac{1}{\omega} m_{\lceil n/2 \rceil - 1}$$

1041 □

1042 **Lemma F.4.** *Linearization of the Hessian If a function  $H : \mathbb{R}^M \rightarrow \mathbb{R}$  is such that its Hessian is*  
 1043  *$\alpha$ -Hölder on the ball  $B(0, r)$ , with  $r > 0, \alpha \in (0, 1)$  and constant  $L$ , then for any  $\mathbf{g}, \mathbf{g}^* \in B(0, r)$ ,*  
 1044 *we have*

$$\|\nabla H(\mathbf{g}) - \nabla^2 H(\mathbf{g}^*)(\mathbf{g} - \mathbf{g}^*)\| \leq C \|\mathbf{g} - \mathbf{g}^*\|^{1+\alpha},$$

1045 *where  $C = \frac{L}{\alpha+1}$ .*

1046 *Proof.* Consider the Taylor expansion of  $\nabla H(\mathbf{g})$  around  $\mathbf{g}^*$ :

$$\nabla H(\mathbf{g}) = \nabla H(\mathbf{g}^*) + \nabla^2 H(\mathbf{g}^*)(\mathbf{g} - \mathbf{g}^*) + R(\mathbf{g}),$$

1047 where the remainder term  $R(\mathbf{g})$  is given by:

$$R(\mathbf{g}) = \int_0^1 [\nabla^2 H(\mathbf{g}^* + t(\mathbf{g} - \mathbf{g}^*)) - \nabla^2 H(\mathbf{g}^*)] (\mathbf{g} - \mathbf{g}^*) dt.$$

1048 By the assumption of  $\alpha$ -Hölder continuity of the Hessian, we have

$$\|\nabla^2 H(\mathbf{g}^* + t(\mathbf{g} - \mathbf{g}^*)) - \nabla^2 H(\mathbf{g}^*)\| \leq L\|t(\mathbf{g} - \mathbf{g}^*)\|^\alpha = Lt^\alpha \|\mathbf{g} - \mathbf{g}^*\|^\alpha.$$

1049 Thus,

$$\|R(\mathbf{g})\| \leq \int_0^1 Lt^\alpha \|\mathbf{g} - \mathbf{g}^*\|^\alpha \|\mathbf{g} - \mathbf{g}^*\| dt = L\|\mathbf{g} - \mathbf{g}^*\|^{1+\alpha} \int_0^1 t^\alpha dt.$$

1050 Evaluating the integral:

$$\int_0^1 t^\alpha dt = \frac{1}{\alpha + 1}.$$

1051 Therefore,

$$\|R(\mathbf{g})\| \leq \frac{L}{\alpha + 1} \|\mathbf{g} - \mathbf{g}^*\|^{1+\alpha}.$$

1052 This implies the desired inequality:

$$\|\nabla H(\mathbf{g}) - \nabla^2 H(\mathbf{g}^*)(\mathbf{g} - \mathbf{g}^*)\| \leq C\|\mathbf{g} - \mathbf{g}^*\|^{1+\alpha},$$

1053 where  $C = \frac{L}{\alpha+1}$ . □

1054
